1 **Title: “Late Bayesian inference in sensorimotor behavior”**

2

3 **Evan Remington<sup>1</sup>, Mehrdad Jazayeri<sup>1</sup>**

4

5 <sup>1</sup>Department of Brain & Cognitive Sciences, McGovern Institute for Brain Research, Massachusetts  
6 Institute of Technology, Cambridge, Massachusetts 02139, USA

7

8

9 **Correspondence**

10

11 Mehrdad Jazayeri, Ph.D.

12

13 Robert A. Swanson Career Development Professor

14 Assistant Professor, Department of Brain and Cognitive Sciences

15 Investigator, McGovern Institute for Brain Research

16 Investigator, Center for Sensorimotor Neural Engineering

17 MIT 46-6041

18 43 Vassar Street

19 Cambridge, MA 02139, USA

20 Phone: 617-715-5418

21 Fax: 617-253-5659

22 Email: [mjaz@mit.edu](mailto:mjaz@mit.edu)

23

24 **Acknowledgements**

25 We would like to thank Josh McDermott, Seth Egger, and Devika Narain for valuable comments

26 regarding the manuscript. M.J. is supported by NIH (NINDS-NS078127), the Sloan Foundation, the

27 Klingenstein Foundation, the Simons Foundation, the Center for Sensorimotor Neural Engineering, and

28 the McGovern Institute.

## 29 **Abstract**

30  
31 Sensorimotor skills rely on performing noisy sensorimotor computations on noisy sensory  
32 measurements. Bayesian models suggest that humans compensate for measurement noise and  
33 reduce behavioral variability by biasing perception toward prior expectations. Whether the same holds  
34 for noise in sensorimotor computations is not known. Testing human subjects in tasks with different  
35 levels of sensorimotor complexity, we found a similar bias-variance tradeoff associated with increased  
36 sensorimotor noise. This result was accurately captured by a model which implements Bayesian  
37 inference after – not before – sensorimotor transformation. These results indicate that humans perform  
38 “late inference” downstream of sensorimotor computations rather than, or in addition to, “early  
39 inference” in the perceptual domain. The brain thus possesses internal models of noise in both sensory  
40 measurements and sensorimotor computations.

## 41 **Introduction**

42  
43 Consider the challenging task of returning a tennis serve. Not only must one accurately infer the path of  
44 the ball but also quickly transform that information into a motor plan that would yield a desirable  
45 outcome. The ability to apply such transformations is central to our behavioral repertoire and to the  
46 performance of athletes, musicians, and professionals such as surgeons and airplane pilots. It has  
47 been demonstrated that sensorimotor transformations are noisy (Soechting and Flanders 1989b; Pine  
48 et al. 1996; Gordon, Ghilardi, and Ghez 1994; McIntyre et al. 2000; Sober and Sabes 2005;  
49 Churchland, Afshar, and Shenoy 2006; Schlicht and Schrater 2007). The ubiquitous nature of  
50 sensorimotor transformations in behavior raises an important and unresolved question: does the brain  
51 have an internal model of sensorimotor noise (SMN), and do humans adopt strategies to mitigate its  
52 effects?

53  
54 Research in the past several decades has tackled a similar question in the domain of sensory and  
55 motor systems, asking whether the brain is optimized to handle sensory and motor noise. Bayesian  
56 models have shown that humans adopt a number of strategies to minimize the effect of sensory and  
57 motor noise on behavior. For instance, when multiple sensory cues are available, humans rely more  
58 heavily on cues that are more reliable (R. J. van Beers, Sittig, and Gon 1999; Ernst and Banks 2002;  
59 Alais and Burr 2004; Bresciani, Dammeier, and Ernst 2008). Similarly, humans use their prior  
60 knowledge of statistics of sensory inputs to improve sensory estimates (Weiss, Simoncelli, and Adelson  
61 2002; Körding and Wolpert 2004; Tassinari, Hudson, and Landy 2006; Jazayeri and Shadlen 2010).  
62 Optimal strategies in the presence of motor noise have also been reported, for example, when some  
63 movements are made more costly than others (Trommershäuser et al. 2005; Landy, Trommershäuser,  
64 and Daw 2012). These and related observations in multiple modalities (Battaglia, Jacobs, and Aslin

65 2003; Körding, Ku, and Wolpert 2004; Schlicht and Schrater 2007; Burge, Ernst, and Banks 2008;  
66 Butler et al. 2010) have provided strong evidence that the brain has an internal model of noisy  
67 representations in the sensory and motor systems and implements strategies to reduce their degrading  
68 effect on behavior.

69  
70 Motivated by the success of normative models showing that the brain seeks to optimize behavior in the  
71 presence of sensory and motor noise, we hypothesized that the brain might additionally be equipped  
72 with mechanisms to minimize the effects of additional noise introduced by the transformation of sensory  
73 inputs to motor outputs (i.e., SMN). This question is particularly important as it bears on where in the  
74 brain Bayesian inferences are made (**Figure 1**). Since existing evidence supports perceptual Bayesian  
75 inference in the sensory domain (Weiss, Simoncelli, and Adelson 2002; Kersten, Mamassian, and  
76 Yuille 2004; Girshick, Landy, and Simoncelli 2011), an observation that Bayesian estimation does not  
77 take SMN into account would support the notion that observers employ an “early inference” strategy in  
78 which the inference is made within the sensory system before a sensorimotor transformation is applied.  
79 If, on the other hand, the brain takes SMN into account, we would conclude that the inference is made  
80 downstream after the sensorimotor transformation stage, thus providing evidence for a “late inference”  
81 strategy in the association and/or premotor brain areas. Critically, the early and late inference strategies  
82 make distinct predictions about the effect of SMN on behavior. With an early inference strategy, any  
83 increases in SMN would lead to comparable increases in behavioral variability. In contrast, in the late  
84 inference model, the brain would counter this variance by using knowledge about the distribution of  
85 responses (i.e., prior distribution). This strategy would introduce additional biases toward the mean of  
86 the prior distribution and lead to an overall improvement in performance.

87  
88 To distinguish between the early and late inference strategies, we exploited the observation that more  
89 complex sensorimotor transformations engender more noise (Soechting and Flanders 1989b; Pine et  
90 al. 1996; McIntyre et al. 2000; Sober and Sabes 2005; Schlicht and Schrater 2007). We devised two  
91 experiments: (1) a time interval estimation and production task, and (2) a length estimation and  
92 production task. In each task, we compared subject’s performance across two sensorimotor contexts.  
93 In one context, which we refer to as the “identity context”, the produced quantity (time interval or length)  
94 had to match a previously measured quantity. This was compared to a more complex “remapped  
95 context” in which subjects had to produce a quantity by applying a non-identity transformation to the  
96 sensory quantity. For example, subjects had to produce a length that was 50% longer than the  
97 stimulus.

98  
99 As expected, the remapped context negatively impacted performance in both tasks, revealing the  
100 degrading effect of SMN. Importantly, increases in SMN in the remapped context led to increased  
101 biases toward the mean of the sensorimotor prior, an indication of the late Bayesian inference that

102 takes SMN into account. These results reveal that the brain has an internal model of the noise  
103 associated with sensorimotor transformations and integrates this information with prior knowledge to  
104 optimize inferences in terms of produced quantities.

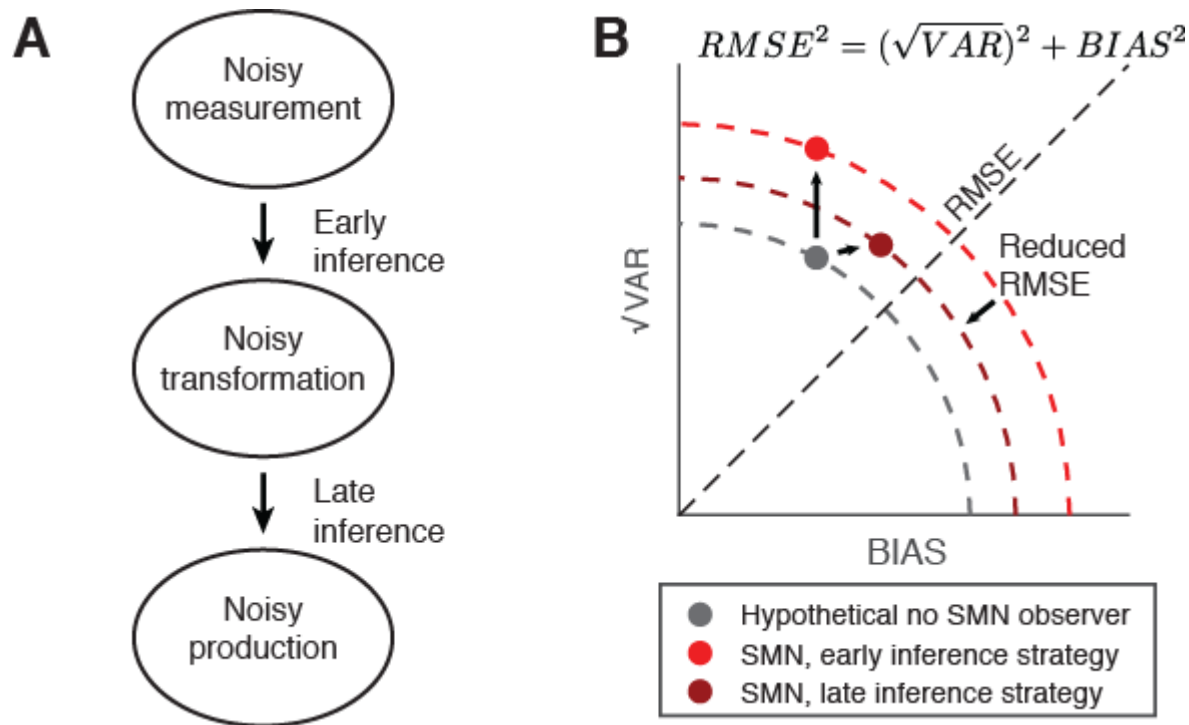

105  
 106  
 107 **Figure 1.** Bayesian inference in the presence of sensorimotor noise (SMN). **A.** A schematic of a  
 108 sensorimotor task comprising sensory measurement, sensorimotor transformation, and motor  
 109 production, all subject to internal noise. In sensorimotor tasks which don't explicitly model SMN,  
 110 subjects' behavior is consistent with a strategy in which the effect of sensory noise ("noisy  
 111 measurement") on behavior is mitigated by Bayesian inference which biases perceptual estimates  
 112 towards the mean of a sensory prior, reducing behavioral variability. We refer to this strategy as "early  
 113 inference." An alternate strategy, which we term "late inference" incorporates a prior on behavioral  
 114 responses to mitigate the effects of both sensory and sensorimotor noise ("noisy transformation").  
 115 Motor noise ("noisy production"), such as that inherent in motor neurons and muscles, cannot be  
 116 mitigated by relying on prior information. **(B)** An illustration of relationship between overall variability  
 117 ( $\sqrt{VAR}$ ), overall bias ( $BIAS$ ), and  $RMSE$  for the early Inference and late Inference strategies in the  
 118 presence of SMN. The equation shows the mathematical relationship between  $\sqrt{VAR}$ ,  $BIAS$ , and  
 119  $RMSE$ . This relationship can be depicted on a quarter circle (dashed lines) with the radius representing  
 120  $RMSE$ . The gray circle represents  $\sqrt{VAR}$  and  $BIAS$  values for hypothetical observer with sensory and  
 121 motor noise only, and no sensorimotor noise ("no SMN observer"). For this case, early inference and  
 122 late inference strategies produce identical behavior (gray). Introducing SMN will cause  $RMSE$  to  
 123 increase. For an observer that uses an early inference strategy, the increase in  $RMSE$  will manifest  
 124 primarily as increased  $\sqrt{VAR}$  (bright red). In contrast, the effect of SMN in an observer using a late  
 125 inference strategy (dark red) would be primarily an increase in  $BIAS$ . Crucially, the late inference  
 126 strategy would lead to a smaller increase in  $RMSE$ , as represented by the smaller radius of the dark  
 127 circle compared to the bright one.

## 128 **Results**

129  
130 We conducted two psychophysical experiments, one involving measurement and production time  
131 intervals, and another involving measurement and production of lengths. Each trial in each task  
132 consisted of two epochs: a measurement epoch during which a sensory quantity (time interval or  
133 length) was measured, and a subsequent production epoch during which subjects had to produce a  
134 quantity based on the preceding measurement. For each task, performance was quantified in two  
135 sensorimotor contexts: an identity context in which the produced quantity had to match the sensory  
136 quantity, and a remapped context in which the produced quantity had to match the sensory quantity  
137 multiplied by a fixed scale factor.

138

### 139 **Time measurement and production task: Ready, Set, Go**

140 Eight human subjects performed a time interval measurement and production task (**figure 2A**), also  
141 known as the “Ready, Set, Go” task, similar to a previous study (Jazayeri and Shadlen 2010). During  
142 the measurement epoch, subjects were presented with a sample interval ( $t_s$ ; see **Table 1** for all  
143 variables and abbreviations) demarcated by two visual flashes, “Ready” and “Set” (**figure 2A**). Subjects  
144 had to measure  $t_s$  and produce an interval ( $t_p$ ) afterwards by a key press (“Go” - no flash). The interval  
145  $t_p$  was measured from the start of the Set flash until the key press. In both identity and remapped  
146 contexts,  $t_s$  was drawn from the same discrete uniform prior distribution with 11 values ranging from  
147 600 and 1000 ms. In the identity context, the correct interval ( $t_c$ ) was the same as  $t_s$ , and in the  
148 remapped context,  $t_c$  was 1.5 times  $t_s$ . In other words, the two contexts were identical during the  
149 measurement epochs but differed with respect to the production epoch. We denote these two contexts  
150 in terms of a gain factors relating  $t_c$  to  $t_s$ : gain = 1 for the identity context, and gain = 1.5 for the  
151 remapped context. Subjects received trial-by-trial feedback about their performance (see Methods).

152

153 We quantified performance with three statistics (Jazayeri and Shadlen 2010): *BIAS*, which summarizes  
154 the deviation of average responses from the correct interval,  $\sqrt{VAR}$ , which summarizes the variability of  
155 responses across  $t_s$ , and *RMSE*, which summarizes the total root mean square error. The three  
156 quantities are related through a sum of squares:  $RMSE^2 = (\sqrt{VAR})^2 + BIAS^2$  (**Figure 1B**). To ensure  
157 that the results were not influenced by overall tendencies to be late or early for all intervals, we  
158 calculated these statistics after removing an offset term that accounted for subjects’ overall bias (see  
159 Methods). For most subjects, the offset term was relatively small (**see Supplementary Table 1**).

160

161 **Figure 2B** illustrates the behavior of a typical subject in the identity (gray) and remapped (red) contexts  
162 of the timing task. Subjects’ behavior in the identity context exhibited prior-dependent bias, consistent  
163 with Bayesian integration as was shown previously (Jazayeri and Shadlen 2010; Acerbi, Wolpert, and  
164 Vijayakumar 2012; Cicchini et al. 2012) (**figure 2B**, in gray). In the remapped context, subjects had to  
165 perform the same task but with a gain of 1.5. We hypothesized that this more challenging sensorimotor

166 transformation would cause an increase in SMN, and would thus increase the total *RMSE*. Additionally,  
167 we hypothesized that the increase in *RMSE* would be predominantly due to an increase in bias,  
168 consistent with the late inference hypothesis.

169  
170 We tested the first hypothesis (increased SMN in the remapped context) by comparing behavior in the  
171 remapped context to that predicted under the assumption of no additional SMN. This null hypothesis  
172 can be formulated straightforwardly by applying the gain factor of 1.5 to the estimates of  $t_s$  and taking  
173 into account the additional variability in  $t_p$  due to the linear scaling of production noise (Rakitin et al.  
174 1998; Gallistel and Gibbon 2000). This leads to a simple prediction: without additional SMN, *RMSE*,  
175 *BIAS*, and  $\sqrt{VAR}$  in the remapped context should be 1.5 times their values in the identity context (**figure**  
176 **2B,C**). As shown by the example subject (**figure 2C**) as well as results across all eight subjects (**figure**  
177 **3A, top**), the observed *RMSE* in the remapped context was consistently and significantly higher than  
178 expected under the assumption of no additional SMN (*RMSE* median = 130 ms, interquartile range =  
179 20 ms vs. median = 180 ms, IQR = 40 ms,  $p = 0.016$ , Wilcoxon signed-rank test). This provides direct  
180 evidence that SMN increased in the remapped context and validates the success of our experimental  
181 design in manipulating SMN independently of sensory noise.

182  
183 Having established an increase in SMN in the remapped context, we tackled the second hypothesis of  
184 whether the *RMSE* increase was due to an increased bias, as would be predicted if subjects optimized  
185 their behavior to mitigate the effect of SMN with the late inference strategy. The null hypothesis, which  
186 states that subjects do not optimize their behavior in the presence of SMN, can be formulated by an  
187 early inference strategy. In this strategy, subjects take the sensory noise into account but ignore SMN.  
188 This early inference strategy predicts that the increase in *RMSE* in the remapped context should be  
189 explained by an increase in  $\sqrt{VAR}$  and not *BIAS*. This is because, in the early inference strategy, SMN  
190 is introduced after the inference stage and thus can only lead to increased variance (see **Figure 1B**).  
191 As shown in **Figure 2C** for one example subject, the increase in *RMSE* was largely due to an increase  
192 in *BIAS*, which can be readily seen as an excess bias compared to the no additional SMN prediction  
193 (**Figure 2B, Excess bias**). The results for all subjects, summarized in **Figure 3A**, indicate a clear  
194 increase in the *BIAS* for the remapped context relative to the null prediction (*BIAS* median = 73 ms,  
195 interquartile range (IQR) = 30 ms vs. median = 130 ms,  $p = 0.023$ ). Across subjects, there was also a  
196 small but consistent effect on  $\sqrt{VAR}$  (median = 106 ms, IQR = 15 ms vs. median = 113 ms, IQR = 28 ms,  
197  $p = 0.008$ ). *RMSE*, *BIAS*, and  $\sqrt{VAR}$  for individual subjects are summarized in **Supplementary Table 1**.  
198 The substantial increase in *BIAS* across subjects rejects the null hypothesis and provides evidence for  
199 the late Bayesian inference, and indicates that humans take SMN into account to optimize their  
200 responses.

201  
202 Next, we compared the behavior of subjects in the two contexts using a Bayesian observer model

203 **(Supplementary Figure 1**; Equation 4). This model comprises a noisy measurement stage (with scalar  
204 noise parameterized by  $w_m$ ), followed by a Bayesian estimation stage (Bayes-Least Squares), followed  
205 by a noisy production stage (with scalar noise parameter  $w_p$ ) (Jazayeri and Shadlen 2010). The model  
206 established Bayes-optimal behavior in the identity context (**Figure 2B**, “model fit,” bottom). We then fit  
207 the same model to subjects’ data in the remapped context allowing the parameters ( $w_m$  and  $w_p$ ) to take  
208 different values (**Figure 2B**, “model fit,” bottom). Without a mechanism to take SMN into account  
209 explicitly, the fits of this model to the remapped context would misattribute the drop in performance as  
210 being due to higher noise levels in the measurement ( $w_m$ ) and/or production ( $w_p$ ) relative to the identity  
211 context. As such, increases in *BIAS* would result in larger  $w_m$ , and increases in  $\sqrt{VAR}$ , in larger  $w_p$   
212 (**Supplementary Figure 2**). Since the early and late inference strategies are associated with increases  
213 in *BIAS* and  $\sqrt{VAR}$  respectively, we predicted that fitting this model to the data in the remapped context  
214 would result in a systematic increase in  $w_m$  and not  $w_p$ . Model fits supported this prediction:  $w_m$  were  
215 substantially higher in the remapped context compared to the identity context (**Figure 3B**, also see  
216 **Supplementary Table 1**). This result further substantiates the hypothesis that increased SMN in the  
217 remapped context led to additional bias consistent with a late Bayesian inference strategy (**Figure 1A**).  
218

219 To further validate this conclusion, we formulated a “Late-Inference” model in which we held  $w_m$  and  $w_p$   
220 constant across contexts and added an additional scalar SMN parameterized by  $w_t$  in the remapped  
221 context. This model made late inference by virtue of the fact that inference was made after the  
222 introduction of  $w_t$ . This Late-Inference model accurately captured the tradeoff between bias and  
223 variance in both contexts (**Figure 4A**), consistent with our hypothesis that additional bias in the  
224 remapped context was driven by increased SMN. We contrasted this model with two alternatives. First,  
225 we tested for the necessity of the additional scalar SMN by constructing an “Equal-SMN” model which  
226 omitted  $w_t$ . This model was unable to simultaneously capture *RMSE*, *BIAS*, and  $\sqrt{VAR}$  in both contexts.  
227 Importantly, it systematically underestimated the bias in the remapped context (**Figure 4B**), validating  
228 the need for additional  $w_t$  in the remapped context. The second alternative model contrasted the Late-  
229 Inference model with an “Early-Inference” model in which the inference was made prior to the SMN.  
230 Similar to the Equal-SMN model, the Early-Inference model failed to capture behavior (**Figure 4B**),  
231 highlighting the importance of late inference in explaining subjects’ behavior. The superiority of the Late-  
232 Inference model was further supported by a model comparison using a Bayesian information criterion  
233 (*BIC*; **Supplementary Table 2**).

234  
235 We considered a number of other models, but were unable to create any model that could account for  
236 the increased *BIAS* as accurately as the Late-Inference model. Here, we describe two alternative  
237 models that predicted some additional bias in the presence of higher SMN but were nonetheless  
238 inferior to the Late-Inference model. The first model, which we refer to as “Late-Ignore-SMN”, is a  
239 variant of the Late-Inference model in which the observers makes the inference after the addition of



240 SMN (through  $w_t$ ), but does not take SMN into account. In other words, this is a model of an observer  
241 that uses a Late-Inference strategy but does not have an internal model of SMN. The second, which is  
242 referred to as the “Observer-Actor” model (Jazayeri and Shadlen 2010; Acerbi, Wolpert, and  
243 Vijayakumar 2012), is a variant of the Early-Inference model, which is additionally optimized for scalar  
244 variability in the production stages, but not for SMN. Both of these models predicted some degree of  
245 increased bias and a substantial (and suboptimal) increase in variability that failed to capture subjects’  
246 behavior in the remapped context (**Supplemental Figure 3, Supplementary Table 2**).

247  
248 Another explanation that might account for the increased bias in the remapped context is that subjects  
249 did not learn the transformation correctly, and instead of applying a gain, simply added a fixed delay to  
250 their responses irrespective of the sample interval. Such an offset-adjustment strategy would result in  
251 an effective increase in bias and could thus masquerade as a late Bayesian inference strategy. To  
252 investigate this possibility, we designed a control experiment with a gain factor of 0.75 instead of 1.5.  
253 For a gain of 0.75, a similar offset-adjustment strategy would require subjects to subtract a fixed delay  
254 from their responses. This would predict that responses would exhibit less bias than predicted from  
255 scaling responses by a factor of 0.75 (i.e., the prediction from the equal SMN hypothesis). However, for  
256 the gain of 0.75, similar to the case for a gain of 1.5, subjects’ *RMSE*, *BIAS*, and fits to  $w_m$  were higher  
257 than predicted by the identity context (**Supplementary Figure 4**). Therefore, the increased bias could  
258 not be explained by an offset-adjustment strategy.

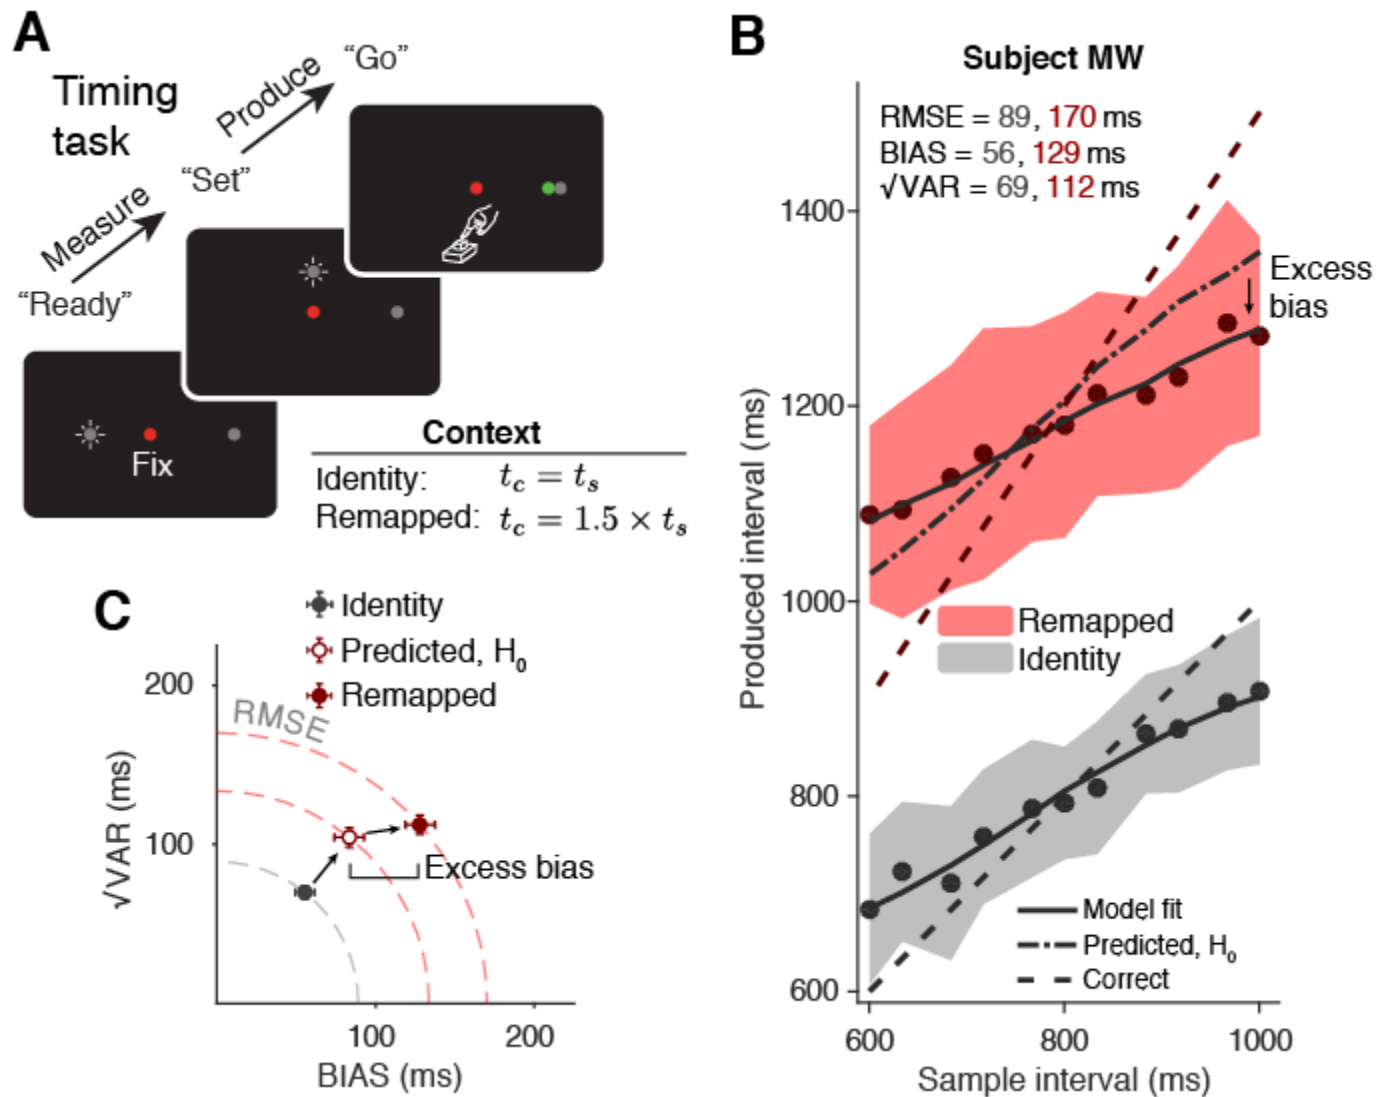

259  
 260 **Figure 2.** Time measurement and production task. **A.** Trial structure. Each trial began with the  
 261 presentation of a red fixation spot. Subjects had to measure a sample time interval  $t_s$  demarcated by  
 262 two flashes ("Ready" and "Set") to the left of and above the fixation point, respectively. After Set,  
 263 subjects pressed a key ("Go") to produce an interval as close as possible to the correct interval  $t_c =$   
 264  $gain \times t_s$ , where  $gain$  changed across two contexts. In the "identity" context, the correct interval was the  
 265 same as  $t_s$  ( $gain = 1$ ), whereas in the "remapped" context, the gain was 1.5. The position of a stimulus  
 266 to the right of the fixation point served as a gain instruction cue. The distance of this stimulus to the  
 267 fixation point is equal to or 1.5 times the distance of Ready to the fixation point for the gain of 1 and 1.5,  
 268 respectively. After the response, subjects received scaled and signed feedback via the position of a  
 269 colored circle (see Methods). **B.** Performance of an example subject in the identity (gray) and  
 270 remapped (red) contexts. Filled circles and shaded regions indicate mean response times  $\pm$  one  
 271 standard deviation; dashed lines represent correct intervals. Solid lines represent the mean responses  
 272 of a Bayesian observer model (see Methods) fit to the subject's data separately for the two contexts;  
 273 the dash-dot line in the  $gain = 1.5$  condition corresponds to the prediction for the remapped context  
 274 under the null hypothesis, using parameters of the model fit to the identity context ( $H_0$ : no additional

275 SMN). The subject's behavior shows excess bias beyond what was predicted assuming no additional  
276 SMN. **C.**  $\sqrt{VAR}$  vs. *BIAS* for the two contexts (gray for identity, and dark red for remapped), as well as  
277 the prediction for the remapped context assuming no additional SMN (empty circle). This prediction  
278 underestimates *RMSE* indicating larger SMN for the remapped context. The increased *RMSE* was  
279 predominantly due to an increase in *BIAS* ("excess bias"). Dashed quarter circles illustrate  
280 combinations of *BIAS* vs.  $\sqrt{VAR}$  giving rise to equal *RMSE*; error bars are computed from the standard  
281 deviation of bootstrapped estimates ( $n = 1000$ ).

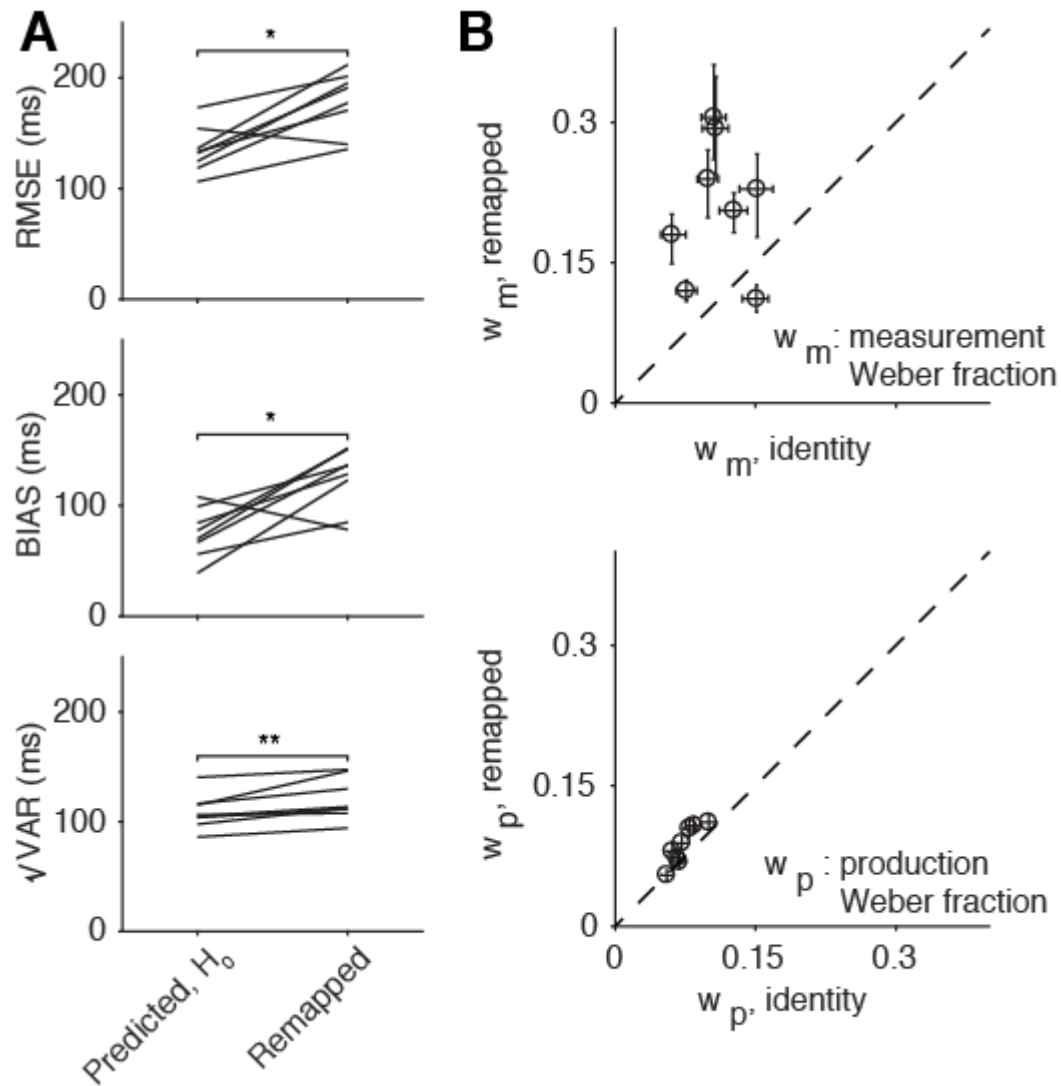

282  
283 **Figure 3.** Summary of subjects' behavior in the time measurement and production task. (A).  
284 Comparison of *RMSE* (top), *BIAS* (middle), and  $\sqrt{VAR}$  (bottom) for all subjects. The lines connect  
285 values predicted in the remapped context assuming no additional SMN (predicted,  $H_0$ ; left) based on  
286 the identity context (i.e. multiplied by the gain of 1.5) to actual values observed from behavior (*gain* =  
287 1.5; right). Almost every subject had higher *RMSE* and *BIAS* than was predicted assuming no  
288 additional SMN. There was also a small increase in  $\sqrt{VAR}$  compared to predictions (\*:  $p < 0.05$ , \*\*:  $p <$   
289 0.01). (B) Parameters of observer model fits. We fit an observer model (see methods) to each subject's  
290 data independently for the two contexts. This model did not explicitly account for SMN, and so any  
291 differences in SMN across contexts were reflected in the measurement and production Weber  
292 parameters ( $w_m$  and  $w_p$ ). Most subjects were fit with much higher values of  $w_m$  (top) in the remapped  
293 context, reflecting additional reliance on prior information consistent with a late inference strategy.  
294 There was also a more modest increase in  $w_p$  for the remapped context (bottom). Error bars represent  
295 95% confidence intervals estimated using a bootstrap procedure ( $n = 1000$ ).

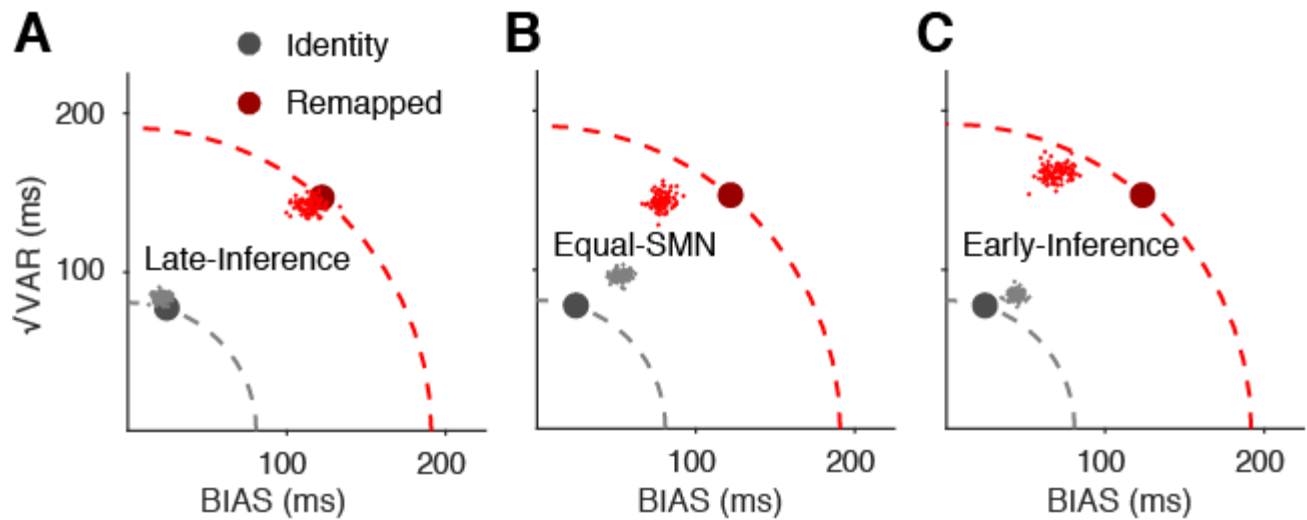

296  
297 **Figure 4.** Model comparison for the time measurement and production task. (A) Comparison of *BIAS*  
298 and  $\sqrt{VAR}$  of a typical subject to simulations generated from fits to behavior using the Late-Inference  
299 model. The model uses the same measurement and production Weber parameters ( $w_m$  and  $w_p$ ) across  
300 the identity (gray) and remapped contexts (red) and introduces additional scalar SMN in the remapped  
301 context parameterized by  $w_t$ . Large solid circles represent the subject's behavior and small dots  
302 represent individual simulations ( $n = 100$ ). (B) Same as A for the Equal-SMN model. This model was  
303 identical to the previously described Bayesian observer model (**Supplementary Figure 1; Figure 3**)  
304 with  $w_m$  and  $w_p$  but no  $w_t$ . The failure of this model to capture subjects' behavior rejects the null  
305 hypothesis that the remapped context can be explained without additional SMN. (C) Same as A for the  
306 Early-Inference model. This model includes  $w_m$ ,  $w_p$ , and  $w_t$ , but the additional scalar SMN is introduced  
307 after the inference stage. The Early-Inference model failed to capture the disparity in *BIAS* between the  
308 two contexts when compared with the Late-Inference model, further supporting the late inference  
309 hypothesis.

## 310 **Length measurement and production task**

311 In a second experiment, we asked whether SMN degrades performance in a length production task,  
312 and whether humans use a late inference strategy to optimize performance in the presence of SMN. To  
313 answer this question, we tested the behavior of seven subjects in a task that involved drawing a line  
314 whose length was either matched to (identity context) or 1.5 times (remapped context) the length of a  
315 visually presented bar (**Figure 5A**). The length of the bar was sampled from a discrete uniform  
316 distribution with 11 values ranging between 10 and 15 visual degrees and was presented on a  
317 horizontally oriented monitor. After presentation of the visual bar, subjects had to draw a bar by moving  
318 a handle that controlled the position of a cursor on the monitor (**Figure 5A**).

319  
320 **Figure 5B** shows the behavior of one subject in the length measurement and production task. Similar  
321 to the timing task, *RMSE* was higher in the remapped context compared to the identity context  
322 suggesting that SMN was larger for the transformation associated with  $gain = 1.5$ . Moreover, the  
323 increase in *RMSE* was associated with an excess bias beyond what was expected from multiplying the  
324 observed bias in the identity context by the gain. The higher *RMSE* and *BIAS* was a general finding  
325 across subjects (**Figure 6A**) indicating that the length task was also associated with a late Bayesian  
326 strategy to compensate for the larger SMN.

327  
328 To further validate these results using model comparisons, we first sought to develop an ideal observer  
329 model of the length task. In the timing task, the Bayesian observer model we used was based on  
330 previous work using a time reproduction task (Jazayeri and Shadlen 2010) and included two  
331 parameters: one scaling factor for the measurement noise ( $w_m$ ), and another for the production noise  
332 ( $w_p$ ). For the length task, we considered the possibility that the production stage might be subject to  
333 additional execution noise due to hand movements, as previous work has suggested (Wolpert,  
334 Ghahramani, and Jordan 1995; Robert J. van Beers, Haggard, and Wolpert 2004). We compared a  
335 model similar to the timing task with scalar measurement and production noise to another model that  
336 included an additional signal independent production noise term  $\sigma_p$ . The model with the additional  
337 nonscalar production noise provided a better description of behavior despite having an additional  
338 parameter (relative BIC of 64, compared to 49 in favor of pure scalar model for the timing task). We  
339 therefore proceeded with this scalar-nonscalar model to compare the identity and remapped contexts.

340  
341 Similar to the timing task, observer model fits in the remapped context were associated with higher  
342 values for  $w_m$  and no systematic relationship to  $w_p$  and  $\sigma_p$  (**Figure 6B**). These results indicate that the  
343 higher SMN in the remapped context is accompanied by higher reliance on prior information, as  
344 expected from the late Bayesian inference strategy. This result was further substantiated by a direct  
345 model comparison based on BIC showing that the Late-Inference model was best at capturing the data  
346 in the remapped context (see **Supplementary Tables 3 & 4** for individual subjects' results and

347 summary).

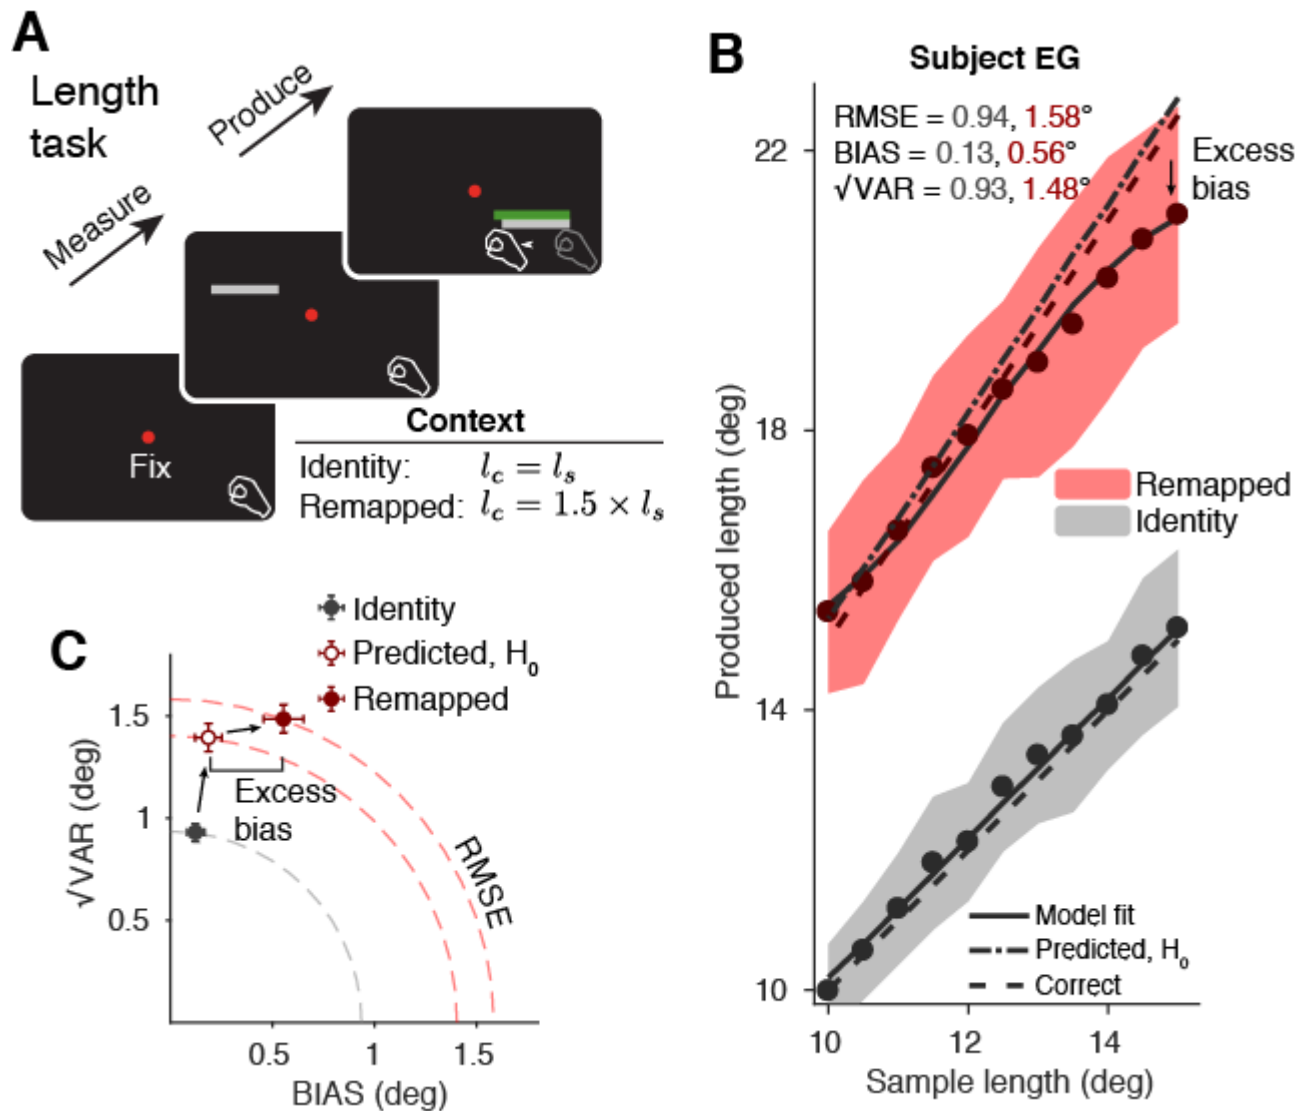

348  
 349 **Figure 5.** Length measurement and production task. **A.** Trial structure. Each trial began with the  
 350 presentation of a red fixation spot. Subjects first measured the length  $l_s$  of a gray sample bar presented  
 351 briefly on an upwards facing monitor. After the sample bar was extinguished, subjects moved a  
 352 manipulandum containing a digitizing pen located under the monitor in order to draw a bar which was  
 353 as close in length as possible to the correct length  $l_c = g \times l_s$ . As in the timing task, there were two  
 354 contexts: in the identity context,  $gain = 1$ , whereas in the remapped context,  $gain = 1.5$ . After the  
 355 response, subjects received scaled and signed feedback via the presentation of a gray bar of the  
 356 proper length while the subjects' produced bar changed color to red (for an inaccurate response) or  
 357 green (for an accurate response; see Methods). **B.** Performance of an example subject in the identity  
 358 (gray) and remapped (red) contexts (same format as **Figure 2**). Filled circles and shaded regions  
 359 indicate mean response times  $\pm$  one standard deviation; dashed lines represent correct intervals. Solid  
 360 lines represent the mean responses of a Bayesian observer model (see Methods) fit to the subject's  
 361 data separately for the two contexts; the dash-dot line in the  $gain = 1.5$  condition corresponds to the  
 362 prediction for the remapped context using parameters of the model fit to the identity context ( $H_0$ : no  
 363 additional SMN). Comparing the model fit for the remapped context to the no additional SMN prediction,



364 the excess bias towards the mean in the remapped relative to the identity context can be seen. **C.**  
365  $\sqrt{VAR}$  vs. *BIAS* for the two contexts (gray for identity, and dark red for remapped), as well as the  
366 prediction for the remapped context assuming no additional SMN (empty circle). This prediction  
367 underestimates *RMSE* indicating larger SMN for the remapped context. The increased *RMSE* was  
368 predominantly due to an increase in *BIAS* (“excess bias”). Dashed quarter circles illustrate  
369 combinations of *BIAS* vs.  $\sqrt{VAR}$  giving rise to equal *RMSE*; error bars are computed from the standard  
370 deviation of bootstrapped estimates ( $n = 1000$ ).

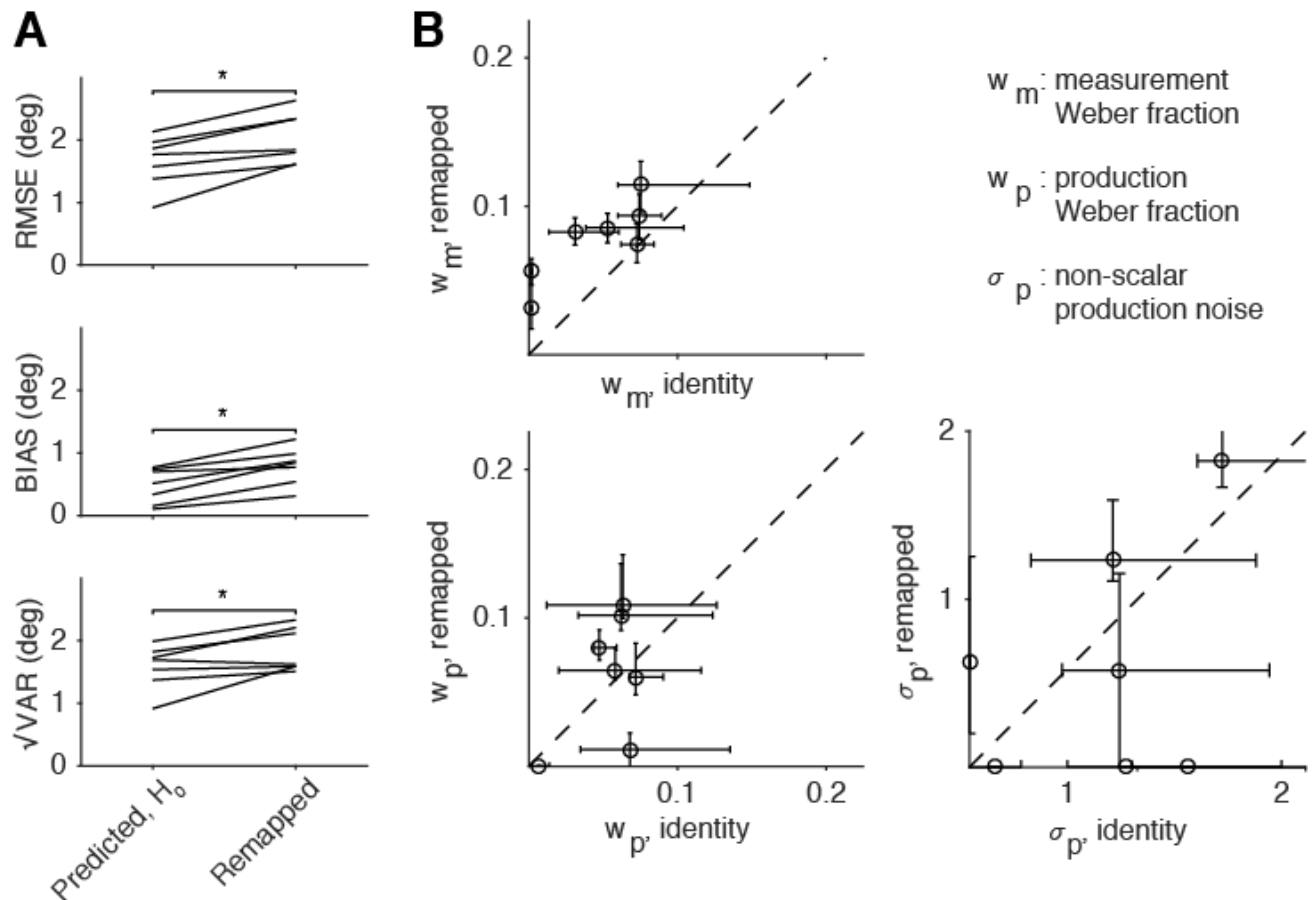

371  
 372 **Figure 6.** Summary of subjects' performance in the length production task. **(A)** Comparison of *RMSE*,  
 373 *BIAS*, and  $\sqrt{VAR}$  for all subjects. The lines connect values predicted in the remapped context based on  
 374 simulated data from the observer model fit to individual subjects' behavior for gain of 1 and assuming  
 375 no additional SMN (predicted,  $H_0$ ; left) to actual values observed from behavior (*gain* = 1.5; right).  
 376 Similar to the timing task, subjects had higher error and were more biased towards the mean than was  
 377 predicted assuming no additional SMN in the remapped context. Variability also increased in most  
 378 subjects (\*:  $p < 0.05$ ). **(B)** Fitting the observer model independently across the two contexts resulted in  
 379 higher values of  $w_m$  in the remapped context, reflecting additional reliance on prior information  
 380 consistent with a late inference strategy. Values for  $w_p$  and the non-scalar motor noise parameter  $\sigma_p$   
 381 were not systematically affected by the gain. Error bars represent 95% confidence intervals estimated  
 382 using a bootstrap procedure ( $n = 1000$ ).

## 383 Discussion

384  
385 Noise in sensorimotor transformations directly impacts performance. To optimize behavior in the  
386 presence of sensorimotor noise, the brain must adopt a late inference strategy that takes sensorimotor  
387 noise into account and adjusts motor plans according to the statistics of the outcomes. Our results  
388 indicate that subjects compensate for noise in sensorimotor transformations by biasing responses  
389 towards the mean of a sensorimotor prior, supporting the hypothesis that humans seek to optimize  
390 behavior in the presence of sensorimotor noise by adopting a late inference strategy. This finding  
391 extends previous work on Bayesian models of sensory and motor systems, and indicates that the brain  
392 circuits are additionally optimized for noise arising from sensorimotor transformations.

393  
394 The vast majority of experiments on the application of Bayesian theory to behavior involve some sort of  
395 sensorimotor transformation. As we found in our work, and others found in other behavioral settings  
396 (Soechting and Flanders 1989b; Gordon, Ghilardi, and Ghez 1994; Pine et al. 1996; McIntyre et al.  
397 2000; Sober and Sabes 2005; Churchland, Afshar, and Shenoy 2006; Schlicht and Schrater 2007),  
398 sensorimotor transformations are often noisy. Surprisingly however, most Bayesian models do not take  
399 SMN into account and formulate Bayesian calculations in terms of sensory inference (Weiss,  
400 Simoncelli, and Adelson 2002; Tassinari, Hudson, and Landy 2006; Jazayeri and Shadlen 2010;  
401 Ganguli and Simoncelli 2014). This approach may be adequate when the sensory noise is the dominant  
402 source of uncertainty (Osborne, Lisberger, and Bialek 2005). However, sensorimotor transformations  
403 may generate a substantial fraction of the total noise. Indeed, for the Late-Inference model, which  
404 captured behavior most accurately, the transformation noise ( $w_t$ ) associated with the remapped context  
405 was larger than measurement noise ( $w_m$ ; **Supplementary Tables 2 & 4**). This suggests that many  
406 previous experiments that ignored SMN and yet found the behavior to be optimal might have  
407 misattributed SMN to noise in sensory representations (see **Figures 3B & 6B**). This is not surprising as  
408 distinguishing between sensory and sensorimotor noise is not straightforward when the two are not  
409 independently manipulated. Our experiment was designed to overcome this challenge by comparing  
410 identity and remapped sensorimotor contexts and thus manipulating SMN without changing the sensory  
411 noise. Finally, it is important to note that our own work is not fully immune to the misattribution of SMN  
412 to sensory noise. While we were able to reveal the excess bias due to larger SMN in the remapped  
413 context, it is conceivable that SMN was a significant factor in the identity context as well. This might  
414 explain why a previous study found time measurement and reproduction task to be more biased than  
415 predicted by noise levels in a temporal bisection task (Cicchini et al. 2012). As such, we might have  
416 underestimated the importance of SMN by misattributing some portion to SMN to measurement noise  
417 in both contexts.

418  
419 Our proposal of a late inference strategy unifies various observations in a wide range of sensorimotor

420 tasks. For example, it has been shown that when both visual and proprioceptive information are  
421 available, subjects rely more strongly on the modality that had the least transformational complexity  
422 (Sober and Sabes 2005). Schlicht and Schrater (Schlicht and Schrater 2007) showed that subjects  
423 account for the effects of eye position uncertainty in a grasping task by increasing grip aperture.  
424 Another study found that reach movements in 3-dimensional space were consistently biased towards  
425 the centroid of target distributions, particularly along the radial (distance) axis, and that this bias was  
426 not seen when subjects performed a simpler pointing task which only required wrist movements  
427 (Soechting and Flanders 1989b). The authors' interpretation of these results was that the brain  
428 implemented linear approximations to the true nonlinear transformations between target location and  
429 motor commands (Soechting and Flanders 1989a). However, our results suggest that the bias might be  
430 due to a stronger influence of prior information when facing the more challenging sensorimotor task of  
431 reaching in 3D. Late inference may also explain response patterns in reaching tasks where biases exist  
432 in arm-centered, rather than eye-centered reference frames (Baud-Bovy and Viviani 1998), or in cases  
433 where target-dependent bias unexplained by sensory noise is attributed to suboptimal aiming strategies  
434 (Tassinari, Hudson, and Landy 2006).

435  
436 Moreover, the late inference model provides a natural explanation for why various post-sensory  
437 cognitive operations cause additional biases in behavior. Without a late inference strategy, one would  
438 expect sources of noise such as memory decay to lead to additional variability. However, a number of  
439 experiments have shown that post-sensory noisy computations can lead substantial increases in bias.  
440 Examples include mental operations in the presence of memory delays (Moyer et al. 1978; Ashourian  
441 and Loewenstein 2011), predictions of complex kinematics (Smith and Vul 2013; Battaglia, Hamrick,  
442 and Tenenbaum 2013), and pointing in 3D space under various memory loads (McIntyre et al. 2000). In  
443 all these cases, the additional biases can be straightforwardly accounted for by considering the  
444 possibility that the brain has an internal model of post-sensory noisy transformations and compensates  
445 for them by using its prior knowledge about the desired outcomes.

446  
447 Late inference may seem at odds with recent proposals that priors based of natural stimuli may already  
448 be applied at low-level sensory areas (Weiss, Simoncelli, and Adelson 2002; Girshick, Landy, and  
449 Simoncelli 2011). However, the late inference model is fully compatible with early integration of sensory  
450 inputs with priors as well as multiple stage of updating the posterior (Ma et al. 2006; Beck et al. 2008;  
451 Ganguli and Simoncelli 2014; Ma and Jazayeri 2014). The key constraint imposed by the late inference  
452 strategy is simply for the brain to delay extracting a point estimate from the posterior distribution to as  
453 late as possible (Simoncelli 2009).

454  
455 Finally, our results bear on the computational principles that govern brain function when information  
456 undergoes multiple processing stages. We found that the brain computations are optimized for

457 sensorimotor transformations suggesting that the inference is made after the addition of sensorimotor  
458 noise. However, late inference is not a special requirement that only applies to sensorimotor noise. The  
459 passage of information in the simplest visuomotor task from the primary visual cortex to downstream  
460 visual areas to sensorimotor cortex to movement control circuits undergoes many stages of processing.  
461 Each stage of processing is likely to have its own private noise and can thus add to the overall  
462 variability. Regardless of the task and where the noise is added, the optimal strategy is to delay  
463 inference until after the final stages of processing (Simoncelli 2009). This applies even when  
464 intermediate transformations are trivial, as must be the case when most of the error can be attributed to  
465 sensory processing (Osborne, Lisberger, and Bialek 2005). This optimality consideration coupled with  
466 evidence from our work that the brain does indeed delay inferences until after the introduction of  
467 sensorimotor noise suggest that brain circuits may employ Bayesian inference as an inherent  
468 computational principle.

469 **Methods**

470

471 **Subjects**

472 Human subjects aged 18-65 years participated in this study after giving informed consent. All  
473 experiments were approved by the Committee on the Use of Humans as Experimental Subjects at the  
474 Massachusetts Institute of Technology. The study consisted of two experiments: a time interval  
475 estimation and production task (Experiment 1), and a length estimation and production task  
476 (Experiment 2). A group of 9 subjects participated in Experiment 1 (8 for gain = 1.5 and 9 for gain =  
477 0.75), and a mostly different group of 7 subjects participated in Experiment 2 (1 subject participated in  
478 both experiments). All subjects had normal or corrected-to-normal vision.

479

480 **Procedures**

481 Experimental sessions lasted approximately 45-60 minutes. Each subject completed 1-2 sessions per  
482 week. Experiments were controlled by an open-source software (MWorks; <http://mworks-project.org/>).  
483 All stimuli were presented on a black background. Although eye movements were not monitored, all  
484 trials began with central fixation spot that subjects were asked to hold their gaze on throughout the trial.  
485 In Experiment 1, subjects viewed all stimuli binocularly from a distance of approximately 67 cm on  
486 either a 23-inch Apple A1082 LCD monitor at a resolution of 1900 x 1200 driven by an Intel Macintosh  
487 Mac Pro computer, or a 24-inch early 2009 Apple Mac Pro at a refresh rate of 60 Hz in a dark, quiet  
488 room. In this experiment, responses were registered on a standard Apple Keyboard connected to the  
489 experimental machine. In Experiment 2, subjects viewed stimuli from above on a 21.5-inch Samsung  
490 SyncMaster SA200 monitor, and responses were registered using a pen digitizer tablet (Wacom  
491 Intuos5 touch); the stylus was fixed at a vertical position inside a custom printed handle which subjects  
492 grasped.

493

494 **Behavioral tasks**

495 Our objective in both experiments was to investigate the effect of sensorimotor noise (SMN) on  
496 performance. To do so, each experiment consisted of two sensorimotor contexts, an “identity” context,  
497 and a more challenging “remapped” context that was expected to involve higher levels of SMN. In each  
498 experiment, human subjects measured a scalar sensory quantity (time interval in Experiment 1, and  
499 length in Experiment 2) drawn from a prior distribution. In the “identity” context, subjects had to  
500 reproduce the sensory quantity (the sample), and in the “remapped” context, they had to produce the  
501 same quantity multiplied by a gain factor. Subjects whose responses for the shortest and longest stimuli  
502 in the identity context were at least one  $d'$  ( $d$ -prime) apart were invited to participate in the main  
503 experiment.

504

505 **Experiment 1: Time interval estimation and production task.** The behavioral task used in

506 Experiment 1 was a variant of the Ready, Set, Go task used in a previous study (Jazayeri and Shadlen  
507 2010). Subjects had to measure a sample interval drawn from an 11-point discrete uniform distribution  
508 between 600 and 1000 ms, then immediately produce an interval that was equal to the sample interval  
509 multiplied by a gain factor. The sample interval was demarcated by two visual flashes (“Ready” and  
510 “Set”) located to the left and above a fixation point at the center of a computer monitor. The production  
511 interval was defined as the interval between the onset of the second flash and the response (key press)  
512 of the subject. In the identity context, the gain was 1, whereas in the remapped contexts the gain was  
513 either 1.5 or 0.75. The gain was fixed in each behavioral session and was communicated at the  
514 beginning of each session as either “same,” “shorter,” or “longer.” The gain was also evident on every  
515 trials: the ratio of the horizontal distance between the Ready flash to the left of the fixation point and a  
516 “Go” cue to the right fixation was set by the gain factor. Following each response, subjects were given  
517 feedback regarding their response via a round marker displayed a distance from the Go cue  
518 proportional to the error and regarding the trial outcome via the color of the marker. A green marker  
519 indicated a “hit” and a white marker indicated a “miss.” Subjects completed two consecutive sessions of  
520 600 trials for each gain; the hit/miss threshold was on a staircase for the first session and fixed for the  
521 second session at the mean of the last 100 trials of the first session. Analyses were performed using  
522 data from the second sessions. All subjects completed the “identity” context sessions first, followed by  
523 either the gain of 1.5 or gain of 0.75, selected pseudorandomly for each subject.

524  
525 **Experiment 2: Length estimation and production task.** The behavioral task used in Experiment 2  
526 was conceptually similar to the first in that subjects produced a scalar quantity multiplied by a gain  
527 factor. However, instead of a time interval, subjects measured and produced visually presented lines  
528 drawn from an 11-point discrete uniform distribution between 10 and 15 degrees visual angle. To  
529 produce the length, subjects had to move a manipulandum underneath a horizontally positioned  
530 computer monitor. In each trial, after subjects positioned the manipulandum at the perimeter of the  
531 screen, a horizontal line flashed for 500 ms, after which subjects had 1200 ms to move the  
532 manipulandum inward to the final response position. Two small vertical bars, one positioned at the  
533 initial location of the manipulandum and one tracking the horizontal location of the bar, provided online  
534 visual feedback during the response. The produced length was measured as the distance between the  
535 two vertical bars at the end of the response period. The gain in the identity and remapped contexts was  
536 1 and 1.5, respectively. The gain was communicated by telling subjects to produce either “the same as”  
537 or “one and a half times” the length of the sample. Response feedback was similar to the interval  
538 production task: following each response, the produced length was shown as a line between the marker  
539 bars (green for hit and red for miss), and the correct length was displayed immediately beneath in gray.  
540 Subjects completed four sessions total with each session comprising two blocks of 150 trials of identity  
541 and remapped trials for a total of 600 trials per session. The error threshold for each gain was on a one-  
542 up one-down staircase for the first two sessions and fixed for the final two sessions at the mean of the

543 last 100 trials for each gain. The order of blocks associated with the identity and remapped blocks was  
544 pseudorandomized across subjects.

### 545 **Data analysis**

546 Behavioral performance in all tasks was quantified with three statistics (Jazayeri and Shadlen 2010):  
547 *BIAS*,  $\sqrt{VAR}$ , and *RMSE*. *BIAS* summarizes the difference between average and correct responses and is  
548 defined as

$$549 \quad BIAS = \sqrt{\sum_{i=1}^N bias_i^2} \quad (1)$$

551 where *bias* is the difference between the mean response and correct response for a given sample  
552 interval.  $\sqrt{VAR}$  summarizes the variability of responses:

$$553 \quad \sqrt{VAR} = \sqrt{\sum_{i=1}^N var_i} \quad (2)$$

554 where *var* is the variance of the responses for a particular sample interval. Because samples were  
555 drawn randomly, it was not the case that the number of trials for each sample was exactly the same.  
556 Therefore, averages of for *BIAS* and  $\sqrt{VAR}$  were normalized across samples according to the number  
557 of trials presented. Finally, *RMSE* was calculated as:

$$558 \quad RMSE = \sqrt{(\sqrt{VAR})^2 + BIAS^2} \quad (3)$$

559 The three quantities are related through a sum of squares:  $RMSE^2 = (\sqrt{VAR})^2 + BIAS^2$  (see **Figure 1B**).  
560 Prior to analyzing data, we identified and removed “lapse” trials for each subject. This involved finding  
561 and removing trials for which responses were greater than three standard deviations from the mean  
562 response for a particular sample quantity and context, and which was performed twice iteratively.

### 564 **Model descriptions and fitting procedure**

565 We employed a Bayesian model previously shown to capture the behavior of human subjects in the  
566 timing task (Jazayeri and Shadlen 2010). The model consists of three stages: a noisy measurement  
567 stage, a deterministic Bayesian inference stage, and a noisy production stage (**Supplementary Figure**  
568 **1**). The noisy measurement  $t_m$  ( $t$  = time) is generated according to the noise model  $p(t_m|t_s)$ , then used  
569 to generate an inference  $t_i$  which minimizes the expected squared error between  $t_i$  and  $t_s$  given  $t_m$ :

$$571 \quad t_i = f(t_m) = \underset{t}{\operatorname{argmin}} \int_{t_s} (t - t_s)^2 p(t_s|t_m) \pi(t_s) dt_s = E[t_s|t_m] \quad (4)$$

572



573 Where  $\pi(t_s)$  represents the observer's "prior" belief about  $t_s$ . The inference, which can be thought of as  
574 a perceptual estimate, is the expected value of the sample interval given the measurement. The model  
575 then generates  $t_p$  according to the production noise model  $p(t_p|t_i)$ .  $p(t_m|t_s)$  and  $p(t_p|t_i)$  were formulated  
576 as Gaussian distributions with means  $t_s$  and  $t_i$ , respectively, and standard deviations that scaled with  
577 the respective means. This model has two free parameters,  $w_m$  and  $w_p$ , which represent the Weber  
578 fractions (i.e., ratio of standard deviation to mean) for  $p(t_m|t_s)$  and  $p(t_p|t_i)$ , respectively. Generally, the  
579 model captures high response variability by increases in  $w_p$ , and large response biases towards the  
580 mean of the prior by increases in  $w_m$ . As a corollary, increases in  $w_p$  have a comparably larger effect  
581 on total error (**Supplementary Figure 2**).

582  
583 This model was used in three ways. First, we used it to predict responses in the remapped context from  
584 fits of the model to the identity context (without changing the model parameters). We used this  
585 approach to generate predictions for the null hypothesis that the remapped context did not engender  
586 additional SMN. Second, we fit this model to the behavior but allowed  $w_m$  and  $w_p$  to take on different  
587 values in the two contexts. We used this approach to distinguish between the early and late inference  
588 hypotheses. Based on the behavior of this model (**Supplementary Figure 2**) we expected a late  
589 inference strategy would cause an increase in response biases and lead to systematic increases in the  
590 fit to  $w_m$  but not  $w_p$ . Third, we used the model to fit the data combined across the two contexts. This  
591 approach would succeed under the null hypothesis that the two contexts have the same level of SMN.  
592 We refer to this model the "Equal-SMN" model.

593  
594 We also developed an "Early-Inference" and a "Late-Inference" model, which included an additional  
595 parameter,  $w_t$ , to capture putative additional SMN in the remapped context. These models were fitted to  
596 the combined data in the two contexts. In the Early-Inference model, Bayesian inference was applied to  
597 the sensory measurement stage, and SMN was added to the production stage (after inference). To do  
598 so, we formulated the production stage such that  $p(t_p|t_i)$  was a scalar Gaussian distribution with mean  
599 of  $gain \times t_i$  and modified Weber fraction  $\sqrt{(w_p^2 + w_t^2)}$ . In contrast, for the Late-Inference model, the effect  
600 of SMN was applied prior to the inference stage by drawing samples of the "remapped" measurement  
601 from a Gaussian distribution  $p(t_i|t_s)$  with mean of  $gain \times t_s$  and Weber fraction  $\sqrt{(w_m^2 + w_t^2)}$ , where  $t_t$   
602 (transformed interval) represents  $t_m$  multiplied by the remapping gain.

603  
604 In the Early-Inference model, the prior distribution corresponded to the sensory variable (i.e., prior to  
605 transformation), whereas in the Late-Inference mode it was formulated based on the transformed  
606 sensory variable (i.e., sensory variable multiplied by the gain). This modified prior represents the  
607 observer's belief about the correct interval and can be viewed as a sensorimotor rather than sensory  
608 prior.

609

610 Model parameters were fit by maximizing the log-likelihood of subjects' responses given the sample  
611 values and gain. The maximization was done using the fminsearch command in MATLAB (Mathworks).  
612 Model fitting and simulation involved numerical integration over the posterior distribution using  
613 Simpson's rule. Parameter searches were repeated ten times each with different parameter  
614 initialization, and results were inspected for consistency.

|                     |                                            |
|---------------------|--------------------------------------------|
| <b>BIAS</b>         | Summary bias                               |
| $l_c$               | correct length interval                    |
| $l_s$               | sample length interval                     |
| <b>RMSE</b>         | Root mean square error                     |
| $\sigma_p$          | Production standard deviation              |
| <b>SMN</b>          | Sensorimotor noise                         |
| $t_c$               | Correct time interval                      |
| $t_i$               | Inferred time interval                     |
| $t_m$               | Measured time interval                     |
| $t_p$               | Produced time interval                     |
| $t_s$               | Sample time interval                       |
| $\sqrt{\text{VAR}}$ | Summary standard deviation                 |
| $w_m$               | Measurement Weber fraction                 |
| $w_p$               | Production Weber fraction                  |
| $w_t$               | Sensorimotor transformation Weber fraction |
|                     |                                            |
| <b>deg</b>          | Visual degrees                             |
| <b>ms</b>           | Milliseconds                               |
| $H_0$               | Null hypothesis                            |

615

616 **Table 1.** Variables and abbreviations.

## 617 References

- 618 Acerbi, Luigi, Daniel M. Wolpert, and Sethu Vijayakumar. 2012. "Internal Representations of Temporal  
619 Statistics and Feedback Calibrate Motor-Sensory Interval Timing." *PLoS Computational Biology* 8  
620 (11): e1002771. doi:10.1371/journal.pcbi.1002771.
- 621 Alais, David, and David Burr. 2004. "The Ventriloquist Effect Results from near-Optimal Bimodal  
622 Integration." *Current Biology: CB* 14 (3). Elsevier: 257–62. doi:10.1016/j.cub.2004.01.029.
- 623 Ashourian, Paymon, and Yonatan Loewenstein. 2011. "Bayesian Inference Underlies the Contraction  
624 Bias in Delayed Comparison Tasks." *PloS One* 6 (5): e19551. doi:10.1371/journal.pone.0019551.
- 625 Battaglia, Peter W., Jessica B. Hamrick, and Joshua B. Tenenbaum. 2013. "Simulation as an Engine of  
626 Physical Scene Understanding." *Proceedings of the National Academy of Sciences of the United  
627 States of America* 110 (45): 18327–32. doi:10.1073/pnas.1306572110.
- 628 Battaglia, Peter W., Robert A. Jacobs, and Richard N. Aslin. 2003. "Bayesian Integration of Visual and  
629 Auditory Signals for Spatial Localization." *Journal of the Optical Society of America. A, Optics,  
630 Image Science, and Vision* 20 (7). osapublishing.org: 1391–97.  
631 <http://www.ncbi.nlm.nih.gov/pubmed/12868643>.
- 632 Baud-Bovy, G., and P. Viviani. 1998. "Pointing to Kinesthetic Targets in Space." *The Journal of  
633 Neuroscience: The Official Journal of the Society for Neuroscience* 18 (4). Soc Neuroscience:  
634 1528–45. <https://www.ncbi.nlm.nih.gov/pubmed/9454859>.
- 635 Beck, Jeffrey M., Wei Ji Ma, Roozbeh Kiani, Tim Hanks, Anne K. Churchland, Jamie Roitman, Michael  
636 N. Shadlen, Peter E. Latham, and Alexandre Pouget. 2008. "Probabilistic Population Codes for  
637 Bayesian Decision Making." *Neuron* 60 (6): 1142–52. doi:10.1016/j.neuron.2008.09.021.
- 638 Beers, R. J. van, A. C. Sittig, and J. J. Gon. 1999. "Integration of Proprioceptive and Visual Position-  
639 Information: An Experimentally Supported Model." *Journal of Neurophysiology* 81 (3). Am  
640 Physiological Soc: 1355–64. <https://www.ncbi.nlm.nih.gov/pubmed/10085361>.
- 641 Beers, Robert J. van, Patrick Haggard, and Daniel M. Wolpert. 2004. "The Role of Execution Noise in  
642 Movement Variability." *Journal of Neurophysiology* 91 (2): 1050–63. doi:10.1152/jn.00652.2003.
- 643 Bresciani, Jean-Pierre, Franziska Dammeier, and Marc O. Ernst. 2008. "Tri-Modal Integration of Visual,  
644 Tactile and Auditory Signals for the Perception of Sequences of Events." *Brain Research Bulletin*  
645 75 (6). Elsevier: 753–60. doi:10.1016/j.brainresbull.2008.01.009.
- 646 Burge, Johannes, Marc O. Ernst, and Martin S. Banks. 2008. "The Statistical Determinants of  
647 Adaptation Rate in Human Reaching." *Journal of Vision* 8 (4). [jov.arvojournals.org](http://jov.arvojournals.org): 20.1–19.  
648 doi:10.1167/8.4.20.
- 649 Butler, John S., Stuart T. Smith, Jennifer L. Campos, and Heinrich H. Bühlhoff. 2010. "Bayesian  
650 Integration of Visual and Vestibular Signals for Heading." *Journal of Vision* 10 (11).  
651 [jov.arvojournals.org](http://jov.arvojournals.org): 23. doi:10.1167/10.11.23.
- 652 Churchland, Mark M., Afsheen Afshar, and Krishna V. Shenoy. 2006. "A Central Source of Movement  
653 Variability." *Neuron* 52 (6): 1085–96. doi:10.1016/j.neuron.2006.10.034.

- 654 Cicchini, Guido Marco, Roberto Arrighi, Luca Cecchetti, Marco Giusti, and David C. Burr. 2012.  
655 “Optimal Encoding of Interval Timing in Expert Percussionists.” *The Journal of Neuroscience: The*  
656 *Official Journal of the Society for Neuroscience* 32 (3): 1056–60. doi:10.1523/JNEUROSCI.3411-  
657 11.2012.
- 658 Ernst, Marc O., and Martin S. Banks. 2002. “Humans Integrate Visual and Haptic Information in a  
659 Statistically Optimal Fashion.” *Nature* 415 (6870): 429–33. doi:10.1038/415429a.
- 660 Gallistel, C. R., and J. Gibbon. 2000. “Time, Rate, and Conditioning.” *Psychological Review* 107 (2).  
661 psycnet.apa.org: 289–344. <https://www.ncbi.nlm.nih.gov/pubmed/10789198>.
- 662 Ganguli, Deep, and Eero P. Simoncelli. 2014. “Efficient Sensory Encoding and Bayesian Inference with  
663 Heterogeneous Neural Populations.” *Neural Computation* 26 (10). MIT Press: 2103–34.  
664 doi:10.1162/NECO\_a\_00638.
- 665 Girshick, Ahna R., Michael S. Landy, and Eero P. Simoncelli. 2011. “Cardinal Rules: Visual Orientation  
666 Perception Reflects Knowledge of Environmental Statistics.” *Nature Neuroscience* 14 (7): 926–32.  
667 doi:10.1038/nn.2831.
- 668 Gordon, James, Maria Felice Ghilardi, and Claude Ghez. 1994. “Accuracy of Planar Reaching  
669 Movements.” *Experimental Brain Research. Experimentelle Hirnforschung. Experimentation*  
670 *Cerebrale* 99 (1). Springer-Verlag: 97–111. doi:10.1007/BF00241415.
- 671 Jazayeri, Mehrdad, and Michael N. Shadlen. 2010. “Temporal Context Calibrates Interval Timing.”  
672 *Nature Neuroscience* 13 (8). Nature Publishing Group: 1020–26. doi:10.1038/nn.2590.
- 673 Kersten, Daniel, Pascal Mamassian, and Alan Yuille. 2004. “Object Perception as Bayesian Inference.”  
674 *Annual Review of Psychology* 55: 271–304. doi:10.1146/annurev.psych.55.090902.142005.
- 675 Körding, Konrad P., Shih-Pi Ku, and Daniel M. Wolpert. 2004. “Bayesian Integration in Force  
676 Estimation.” *Journal of Neurophysiology* 92 (5). Am Physiological Soc: 3161–65.  
677 doi:10.1152/jn.00275.2004.
- 678 Körding, Konrad P., and Daniel M. Wolpert. 2004. “Bayesian Integration in Sensorimotor Learning.”  
679 *Nature* 427 (6971): 244–47. doi:10.1038/nature02169.
- 680 Landy, Michael S., Julia Trommershäuser, and Nathaniel D. Daw. 2012. “Dynamic Estimation of Task-  
681 Relevant Variance in Movement under Risk.” *The Journal of Neuroscience: The Official Journal of*  
682 *the Society for Neuroscience* 32 (37): 12702–11. doi:10.1523/JNEUROSCI.6160-11.2012.
- 683 Ma, Wei Ji, Jeffrey M. Beck, Peter E. Latham, and Alexandre Pouget. 2006. “Bayesian Inference with  
684 Probabilistic Population Codes.” *Nature Neuroscience* 9 (11): 1432–38. doi:10.1038/nn1790.
- 685 Ma, Wei Ji, and Mehrdad Jazayeri. 2014. “Neural Coding of Uncertainty and Probability.” *Annual*  
686 *Review of Neuroscience* 37. annualreviews.org: 205–20. doi:10.1146/annurev-neuro-071013-  
687 014017.
- 688 McIntyre, J., F. Stratta, J. Droulez, and F. Lacquaniti. 2000. “Analysis of Pointing Errors Reveals  
689 Properties of Data Representations and Coordinate Transformations Within the Central Nervous  
690 System.” *Neural Computation* 12 (12): 2823–55. doi:10.1162/089976600300014746.

- 691 Moyer, R. S., D. R. Bradley, M. H. Sorensen, C. Whiting, and D. P. Mansfield. 1978. "Psychophysical  
692 Functions for Perceived and Remembered Size." *Science* 200 (4339): 330–32.  
693 doi:10.1126/science.635592.
- 694 Osborne, Leslie C., Stephen G. Lisberger, and William Bialek. 2005. "A Sensory Source for Motor  
695 Variation." *Nature* 437 (7057): 412–16. doi:10.1038/nature03961.
- 696 Pine, Z. M., J. W. Krakauer, J. Gordon, and C. Ghez. 1996. "Learning of Scaling Factors and Reference  
697 Axes for Reaching Movements." *Neuroreport* 7 (14). journals.lww.com: 2357–61.  
698 <https://www.ncbi.nlm.nih.gov/pubmed/8951852>.
- 699 Rakitin, B. C., J. Gibbon, T. B. Penney, C. Malapani, S. C. Hinton, and W. H. Meck. 1998. "Scalar  
700 Expectancy Theory and Peak-Interval Timing in Humans." *Journal of Experimental Psychology.*  
701 *Animal Behavior Processes* 24 (1): 15–33. <http://www.ncbi.nlm.nih.gov/pubmed/9438963>.
- 702 Schlicht, Erik J., and Paul R. Schrater. 2007. "Impact of Coordinate Transformation Uncertainty on  
703 Human Sensorimotor Control." *Journal of Neurophysiology* 97 (6): 4203–14.  
704 doi:10.1152/jn.00160.2007.
- 705 Simoncelli, Eero P. 2009. "Optimal Estimation in Sensory Systems." *The Cognitive Neurosciences, IV.*  
706 MIT Press, 525–35. <http://www.cns.nyu.edu/~rinzel/CMNSS10/simoncelli09a.pdf>.
- 707 Smith, Kevin A., and Edward Vul. 2013. "Sources of Uncertainty in Intuitive Physics." *Topics in*  
708 *Cognitive Science* 5 (1): 185–99. doi:10.1111/tops.12009.
- 709 Sober, Samuel J., and Philip N. Sabes. 2005. "Flexible Strategies for Sensory Integration during Motor  
710 Planning." *Nature Neuroscience* 8 (4): 490–97. doi:10.1038/nn1427.
- 711 Soechting, J. F., and M. Flanders. 1989a. "Errors in Pointing Are due to Approximations in  
712 Sensorimotor Transformations." *Journal of Neurophysiology* 62 (2). Am Physiological Soc: 595–  
713 608. <http://www.ncbi.nlm.nih.gov/pubmed/2769350>.
- 714 Soechting, J. F., and M. Flanders. 1989b. "Sensorimotor Representations for Pointing to Targets in  
715 Three-Dimensional Space." *Journal of Neurophysiology* 62 (2): 582–94.  
716 <http://www.ncbi.nlm.nih.gov/pubmed/2769349>.
- 717 Tassinari, Hadley, Todd E. Hudson, and Michael S. Landy. 2006. "Combining Priors and Noisy Visual  
718 Cues in a Rapid Pointing Task." *The Journal of Neuroscience: The Official Journal of the Society*  
719 *for Neuroscience* 26 (40): 10154–63. doi:10.1523/JNEUROSCI.2779-06.2006.
- 720 Trommershäuser, Julia, Sergei Gepshtein, Laurence T. Maloney, Michael S. Landy, and Martin S.  
721 Banks. 2005. "Optimal Compensation for Changes in Task-Relevant Movement Variability." *The*  
722 *Journal of Neuroscience: The Official Journal of the Society for Neuroscience* 25 (31): 7169–78.  
723 doi:10.1523/JNEUROSCI.1906-05.2005.
- 724 Weiss, Yair, Eero P. Simoncelli, and Edward H. Adelson. 2002. "Motion Illusions as Optimal Percepts."  
725 *Nature Neuroscience* 5 (6). Nature Publishing Group: 598–604. doi:10.1038/nn0602-858.
- 726 Wolpert, D. M., Z. Ghahramani, and M. I. Jordan. 1995. "An Internal Model for Sensorimotor  
727 Integration." *Science* 269 (5232): 1880–82. <https://www.ncbi.nlm.nih.gov/pubmed/7569931>.

728 Wolpert, D. M., Z. Ghahramani, and M. I. Jordan. 1995. "An Internal Model for Sensorimotor  
729 Integration." *Science* 269 (5232): 1880–82. <https://www.ncbi.nlm.nih.gov/pubmed/7569931>.

## 730 **Manuscript Supplement**

731

### 732 **Additional models**

733 We considered two additional models: the Late-Ignore-SMN model and the Observer-Actor model, both  
734 of which predicted more bias than the Early-Inference and Equal-SMN models. However both models  
735 also predicted a substantial increase in variance (**Supplemental Figure 3**), which deviated from  
736 subjects' behavior.

737

### 738 **The Late-Ignore-SMN model**

739 This model utilizes a late inference stage, but the additional noise from sensorimotor transformations is  
740 ignored. More concretely, the model assumes that variability prior to inference is determined by an  
741 effective Weber fraction of  $\sqrt{(w_m^2 + w_t^2)}$  but that subjects compute the posterior based on the incorrect  
742 assumption that the Weber fraction was  $w_m$ . In other words, the inference function  $f()$  ignores  $w_t$ . The  
743 reason why ignored SMN causes an increase in bias in the Late-Ignore model may be somewhat  
744 counterintuitive. To understand this, let us examine the computations that underlie Bayesian inference  
745 in the presence and absence of SMN. In the absence of SMN, there would be a one-to-one  
746 correspondence between a measurement and its transformation. For measurements (and  
747 transformations thereof) that are farther away from the mean of the uniform prior, the nonlinear  
748 inference function (**Supplementary Figure 1, middle panel**) causes more bias in the inferred values.  
749 However, the magnitude of this bias would be the same for both early and late inference because of the  
750 one-to-one correspondence between a measurement and its transformation. This situation changes  
751 however in the presence of SMN. SMN makes the result of this transformation stochastic such that a  
752 single measured interval leads to a distribution of transformed measurements. Therefore, the  
753 magnitude of bias associated with a measurement has to be computed as an expectation across the  
754 distribution of transformed measurements. Since the inference function is nonlinear, it  
755 disproportionately biases transformed measurements that are farther away from the mean of the prior  
756 distribution (and in particular, outside the support of the uniform prior) leading to an overall increase in  
757 the magnitude of the bias.

758

759 While the Late-Ignore-SMN model was able to accommodate more bias, it was not enough to capture  
760 the excess bias observed in the data. The model also predicted substantially increased variance, as  
761 well as a skewing of response distributions away from the correct response (see **Supplementary**  
762 **Figure 3**). We also examined the behavior of the Late-Ignore-SMN model under the assumption that  
763 observers approximate uniform priors as Gaussian-like functions as was suggested previously (Acerbi,  
764 Wolpert, and Vijayakumar 2012; Cicchini et al. 2012). This possibility reduces the amount of bias  
765 introduced by the Late-Ignore-SMN model (data not shown), and further diminishes its utility as a viable  
766 model for the observed biases in subjects' behavior.



## 767 **The Observer-Actor model**

768 This is a variant of the Early-Inference model for which inference is made after the sensory  
769 measurement stage and the production stage is modeled by a Gaussian with mean of  $gain \times t_i$  and  
770 Weber Fraction  $\sqrt{(w_p^2 + w_t^2)}$ . However, following previous work showing that humans account for  
771 response variability when planning actions (Trommershäuser et al. 2005; Landy, Trommershäuser, and  
772 Daw 2012) we augmented the inference stage so that the early inference would take into account the  
773 scalar post-inference variability due to the transformation and production (Acerbi, Wolpert, and  
774 Vijayakumar 2012). The optimal inference under the Observer-Actor model can be computed by  
775 marginalizing over the distribution of produced values,  $p(t_p|t_i)$ :

$$776 \quad t_i = f(t_m) = \underset{t}{\operatorname{argmin}} \int_{t_s} \int_{t_p} (t - t_s)^2 p(t_s | t_m) p(t_p | t) \pi(t_s) dt_p dt_m = \frac{E[t_s | t_m]}{1 + \sqrt{w_p^2 + w_t^2}}$$

777  
778  
779 Here  $t_i$  is the optimal value that the observer using early inference should aim to produce in order to  
780 mitigate the effects of post-inference transformation and production scalar variability. Like the Late-  
781 Ignore-SMN model, this model was able to accommodate a slight increase in bias as it specified all  
782 aimed magnitudes to be smaller than dictated by the Early-Inference model. However, also similar to  
783 the Late-Ignore-SMN model, increasing SMN ( $w_t$ ) primarily affected variance rather than bias  
784 **(Supplemental Figure 3)**.

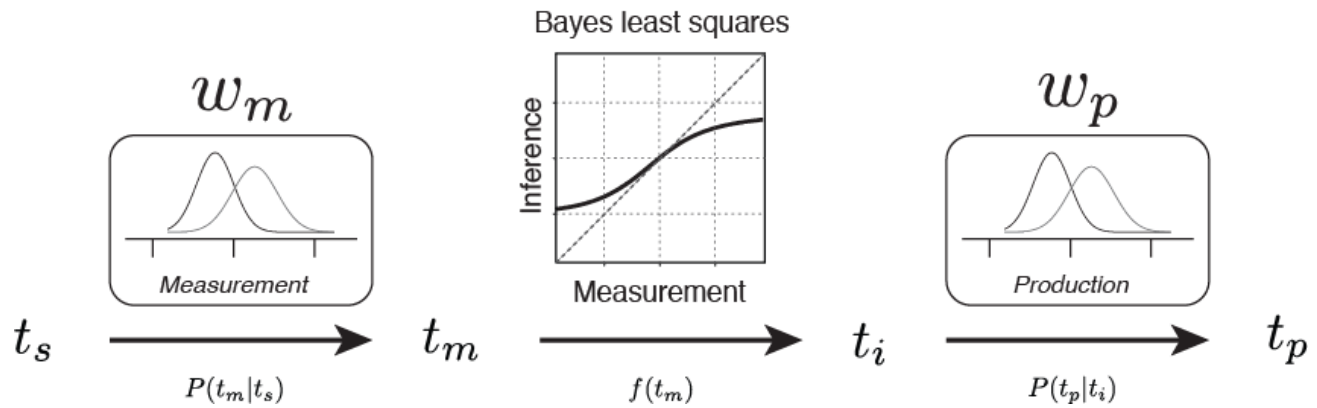

785  
786 **Supplementary Figure 1.** Illustration of the Bayesian observer model previously shown to capture the  
787 behavior of human subjects in the identity context of the timing task (Jazayeri and Shadlen 2010). The  
788 noisy measurement stage (left), takes a sample interval ( $t_s$ ) as input and produces a measurement ( $t_m$ )  
789 corrupted by Gaussian noise with standard deviation equal to the measurement Weber fraction ( $w_m$ )  
790 times the value of  $t_s$ . A deterministic Bayesian inference stage (middle) then takes  $t_m$  as input and  
791 produces an inference  $t_i$  using knowledge of the prior distribution over  $t_s$  as well as the value of  $w_m$   
792 such that the the root mean squared error (RMSE) of  $t_i$  relative to  $t_s$  is minimized. Finally the noisy  
793 production stage (right) takes  $t_i$  as input and generates a produced time ( $t_p$ ) corrupted by Gaussian  
794 noise with standard deviation equal to the production Weber fraction ( $w_p$ ) times the value of  $t_i$ . This  
795 model captures high response variability by increases in  $w_p$  and large response biases towards the  
796 mean of the prior by increases in  $w_m$  (**Supplementary Figure 2**).

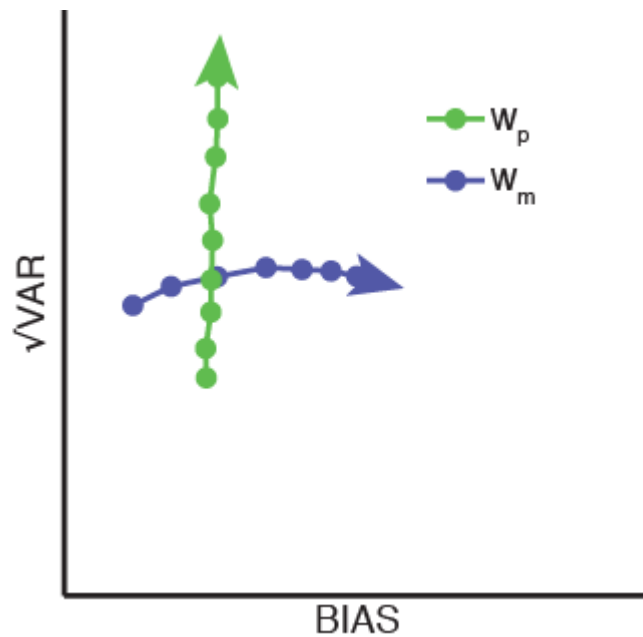

797  
798 **Supplementary Figure 2.** Illustration of the effects of increasing the amount of production and  
799 measurement noise. Using the Bayesian observer model (Jazayeri and Shadlen 2010), we simulated  
800 the effects of varying the amount of motor production noise (green;  $w_p$ : production Weber fraction) and  
801 sensory measurement noise (blue:  $w_m$ : measurement Weber fraction) on  $\sqrt{VAR}$  and *BIAS*. Increasing  
802 the value of  $w_p$  substantially increased variability with almost no increase in bias, whereas increasing  
803  $w_m$  increased bias due to increased reliance on prior information, but had little effect on variability.  
804 Thus, we interpret increases in  $w_m$  (**Figures 3 & 6**) for subjects in the remapped contexts as evidence  
805 for reliance on prior information in a late inference strategy to mitigate the effects of increased SMN  
806 relative to the identity contexts.

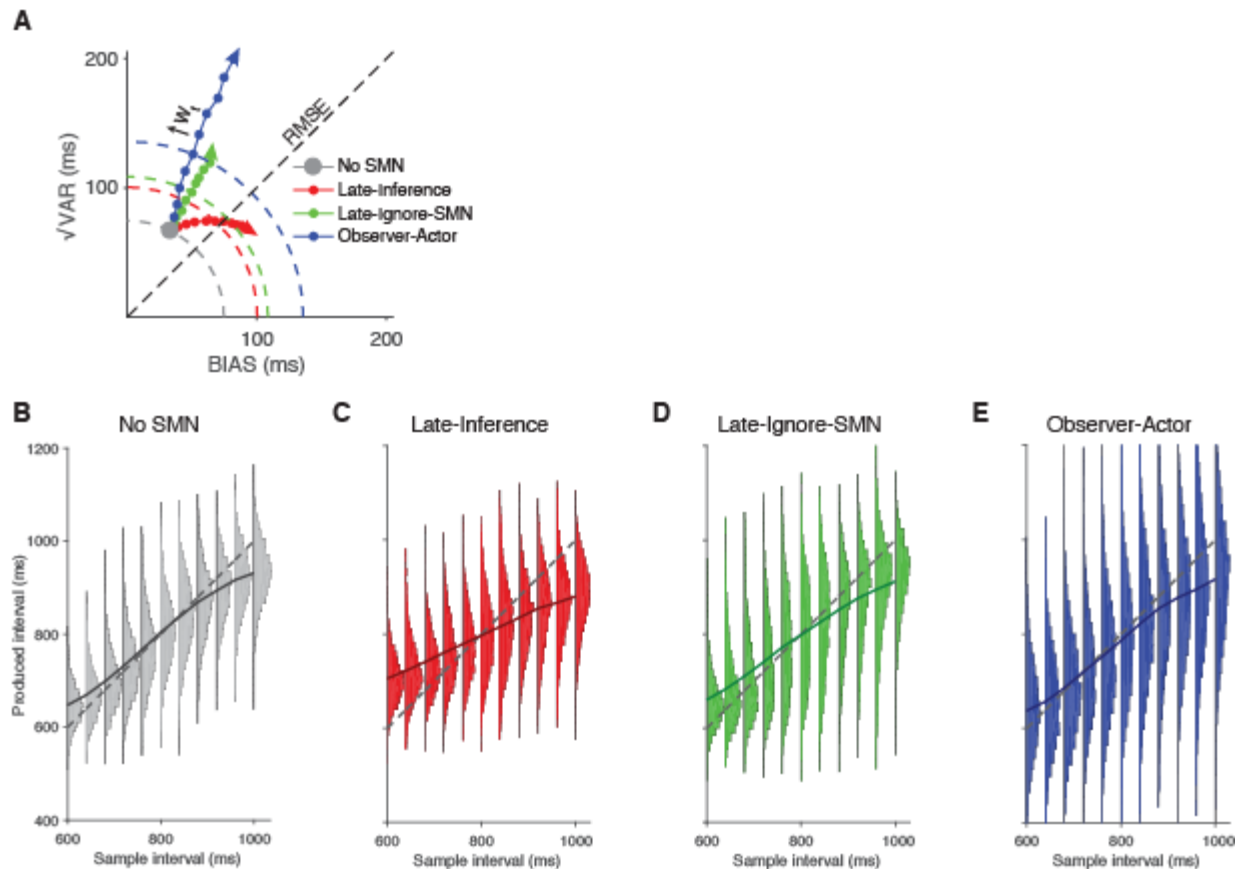

807

808 **Supplementary Figure 3.** Behavior of different models as a result of increasing SMN. **A.** Bias

809 variance curves for three models with increasing SMN ( $w_t = 0.025 - 0.25$ ) relative to a “no SMN”

810 observer model (large gray circle;  $w_m = 0.08$ ;  $w_p = 0.06$ ). For each model (Late-Inference, red; Late-

811 Ignore-SMN, green; Observer-Actor, blue) increasing SMN ( $w_t$ ) causes *RMSE* to increase as evident

812 by increasing distance of circles from the origin. The Late-Inference model compensates for increasing

813 SMN by systematic increases in *BIAS* and has the best performance. The other models exhibit less

814 *BIAS* and more  $\sqrt{VAR}$  leading to larger *RMSE* compared to the Late-Inference model. Quarter circles

815 represent combinations of  $\sqrt{VAR}$  and *BIAS* with equal *RMSE* for  $w_t = 0.14$ . **B-D.** Distribution of

816 responses as a function of sample duration under various models for  $w_t = 0.14$ . **B.** The no SMN

817 observer model, which shows the lowest *RMSE*. **C.** The Late-Inference model (red). In this model, bias

818 increases substantially while variability remains relatively stable (similar to the effect of increasing  $w_m$ ;

819 **Supplementary Figure 2**). **D.** The Late-Ignore-SMN model also adds bias; however, it also leads to a

820 comparable increase in variance. **E.** Increasing transformation noise in the Observer-Actor model

821 primarily increases variance but also adds a small amount of bias towards earlier responses. Due to

822 scalar variability, smaller response magnitudes result in lower production variability. This figure depicts

823 data simulated for the identity context; although we could not measure SMN in the identity context

824 directly, we presume that SMN exists for all behaviors involving a sensorimotor transformation (see

825 **Discussion**).

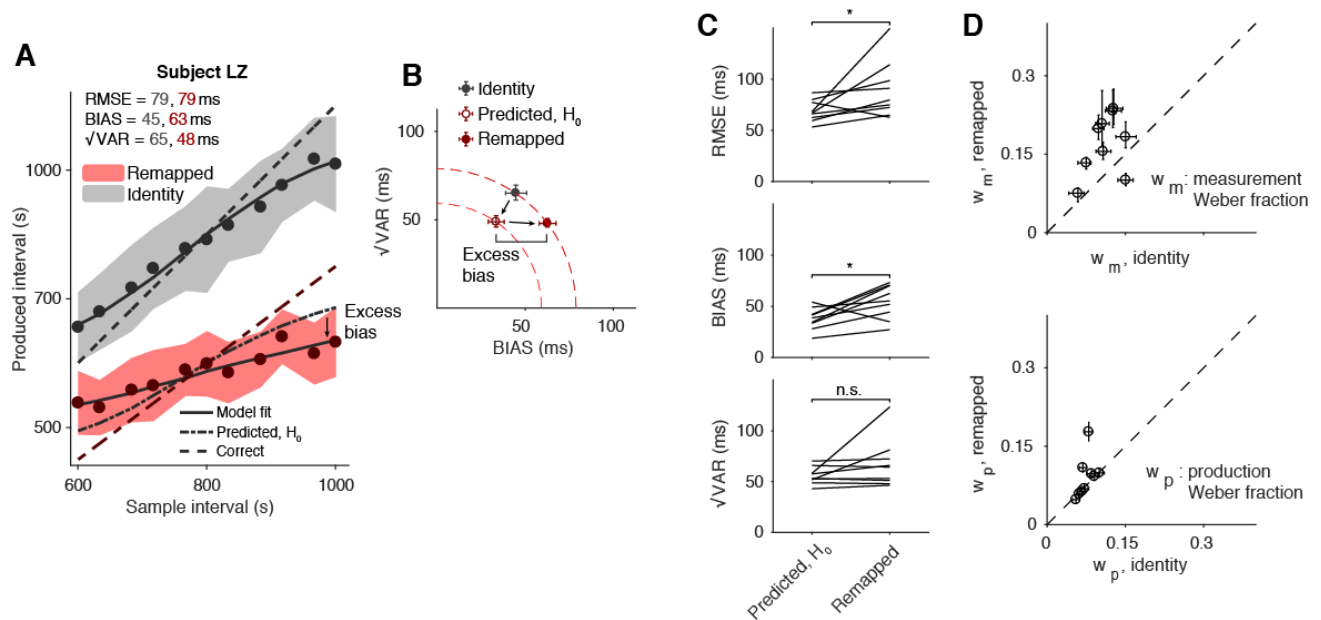

826  
 827 **Supplementary Figure 4.** Time interval reproduction, gain = 0.75. An alternative explanation for  
 828 increased bias in the remapped context (gain = 1.5) which does not involve late inference is that  
 829 subjects did not follow task instructions, adding a constant duration to their responses rather than  
 830 multiplying. To investigate this possibility, we designed a control experiment in which the gain factor  
 831 was 0.75 rather than 1.5. In this case, if subjects added a constant (negative) offset, *BIAS* and fit  $w_m$   
 832 values should decrease. **A.** Performance of an example subject in the identity (gray) and remapped  
 833 (red) contexts. Filled circles and shaded regions indicate mean response times  $\pm$  one standard  
 834 deviation; dashed lines represent correct intervals. Solid lines represent the mean responses of a  
 835 Bayesian observer model (see Methods) fit to the subject's data separately for the two contexts; the  
 836 dash-dot line in the  $g = 0.75$  context represents the model's behavior using parameters fit from the  
 837 identity context. This simulation corresponds to the null prediction of no additional SMN in the  
 838 remapped context. As was the case for  $g = 1.5$ , excess bias towards the mean in the remapped relative  
 839 to the identity context is apparent. **B.**  $\sqrt{\text{VAR}}$  vs. *BIAS* for the two contexts (gray for identity, and dark red  
 840 for remapped), as well as the prediction for the remapped context assuming no additional SMN (empty  
 841 circle). This prediction underestimates *RMSE* indicating larger SMN for the remapped context. The  
 842 increased *RMSE* was entirely due to an increase in *BIAS* ("excess bias"). Dashed quarter circles  
 843 illustrate combinations of *BIAS* vs.  $\sqrt{\text{VAR}}$  giving rise to equal *RMSE*; error bars are computed from the  
 844 standard deviation of bootstrapped estimates ( $n = 1000$ ). **C.** Comparison of *RMSE*, *BIAS*, and  $\sqrt{\text{VAR}}$  for  
 845 nine subjects. On the left are values predicted in the remapped context (i.e. multiplied by the gain of  
 846 0.75), and on the right are the actual values observed from behavior in the remapped context (\*:  $p <$   
 847 0.05). **D.** Parameters of observer model fits. We fit the an observer model with data of individual  
 848 subjects independently for the two contexts. Error bars represent 95% confidence intervals estimated  
 849 using a bootstrap procedure ( $n = 1000$ ). The results of this experiment suggest that response shifting  
 850 strategy does not account for increased bias in the remapped contexts in the timing task.  
 851

## 852 **Supplementary references**

- 853 Acerbi, Luigi, Daniel M. Wolpert, and Sethu Vijayakumar. 2012. "Internal Representations of Temporal  
854 Statistics and Feedback Calibrate Motor-Sensory Interval Timing." *PLoS Computational Biology* 8  
855 (11): e1002771. doi:10.1371/journal.pcbi.1002771.
- 856 Cicchini, Guido Marco, Roberto Arrighi, Luca Cecchetti, Marco Giusti, and David C. Burr. 2012.  
857 "Optimal Encoding of Interval Timing in Expert Percussionists." *The Journal of Neuroscience: The*  
858 *Official Journal of the Society for Neuroscience* 32 (3): 1056–60. doi:10.1523/JNEUROSCI.3411-  
859 11.2012.
- 860 Jazayeri, Mehrdad, and Michael N. Shadlen. 2010. "Temporal Context Calibrates Interval Timing."  
861 *Nature Neuroscience* 13 (8). Nature Publishing Group: 1020–26. doi:10.1038/nn.2590.
- 862 Landy, Michael S., Julia Trommershäuser, and Nathaniel D. Daw. 2012. "Dynamic Estimation of Task-  
863 Relevant Variance in Movement under Risk." *The Journal of Neuroscience: The Official Journal of*  
864 *the Society for Neuroscience* 32 (37): 12702–11. doi:10.1523/JNEUROSCI.6160-11.2012.
- 865 Trommershäuser, Julia, Sergei Gepshtein, Laurence T. Maloney, Michael S. Landy, and Martin S.  
866 Banks. 2005. "Optimal Compensation for Changes in Task-Relevant Movement Variability." *The*  
867 *Journal of Neuroscience: The Official Journal of the Society for Neuroscience* 25 (31): 7169–78.  
868 doi:10.1523/JNEUROSCI.1906-05.2005.

| Subject | Identity context |      |                     |       |       |        | No additional SMN prediction |      |                     | Remapped context |      |                     |       |       |        |
|---------|------------------|------|---------------------|-------|-------|--------|------------------------------|------|---------------------|------------------|------|---------------------|-------|-------|--------|
|         | RMSE             | BIAS | $\sqrt{\text{VAR}}$ | $w_m$ | $w_p$ | offset | RMSE                         | BIAS | $\sqrt{\text{VAR}}$ | RMSE             | BIAS | $\sqrt{\text{VAR}}$ | $w_m$ | $w_p$ | offset |
| CK      | 71               | 37   | 57                  | 0.08  | 0.06  | 20     | 106                          | 56   | 86                  | 136              | 86   | 94                  | 0.12  | 0.05  | 32     |
| JM      | 103              | 72   | 71                  | 0.15  | 0.07  | -22    | 154                          | 108  | 106                 | 140              | 78   | 108                 | 0.11  | 0.07  | -32    |
| MW      | 89               | 56   | 69                  | 0.13  | 0.07  | -1     | 134                          | 84   | 104                 | 171              | 128  | 112                 | 0.21  | 0.07  | -12    |
| RA      | 91               | 46   | 78                  | 0.11  | 0.08  | -8     | 136                          | 69   | 116                 | 212              | 151  | 130                 | 0.30  | 0.11  | -54    |
| SMP     | 83               | 25   | 77                  | 0.06  | 0.08  | -18    | 125                          | 38   | 115                 | 196              | 121  | 146                 | 0.18  | 0.11  | -31    |
| LZ      | 79               | 45   | 65                  | 0.10  | 0.06  | -6     | 119                          | 67   | 98                  | 178              | 137  | 112                 | 0.24  | 0.08  | -13    |
| DS      | 116              | 66   | 94                  | 0.15  | 0.10  | -16    | 173                          | 98   | 140                 | 202              | 136  | 147                 | 0.23  | 0.11  | -21    |
| BG      | 88               | 52   | 70                  | 0.11  | 0.07  | 15     | 132                          | 77   | 105                 | 191              | 151  | 114                 | 0.29  | 0.09  | -25    |

869  
870 **Supplementary Table 1.** Subject performance and observer model parameters for the timing task in the identity and remapped contexts,  
871 along with performance predicted for the remapped context under the prediction of no additional SMN. All values are expressed in  
872 milliseconds, except for  $w_m$  and  $w_p$ , which are unitless.

873  
874

| Subject | Equal-SMN |       |        | Early-Inference |       |       |        | Late-Inference |       |       |        | Late-Ignore-SMN |       |       |        | Observer-Actor |       |       |        |
|---------|-----------|-------|--------|-----------------|-------|-------|--------|----------------|-------|-------|--------|-----------------|-------|-------|--------|----------------|-------|-------|--------|
|         | $w_m$     | $w_p$ | BIC    | $w_m$           | $w_p$ | $w_t$ | BIC    | $w_m$          | $w_p$ | $w_t$ | BIC    | $w_m$           | $w_p$ | $w_t$ | BIC    | $w_m$          | $w_p$ | $w_t$ | BIC    |
| CK      | 0.10      | 0.06  | -2673  | 0.10            | 0.05  | 0.02  | -2667  | 0.08           | 0.05  | 0.09  | -2705  | 0.10            | 0.06  | 0.00  | -2666  | 0.10           | 0.05  | 0.02  | -2669  |
| JM      | 0.13      | 0.07  | -2317  | 0.13            | 0.07  | 0.03  | -2312  | 0.13           | 0.07  | 0.00  | -2310  | 0.13            | 0.07  | 0.00  | -2310  | 0.13           | 0.07  | 0.03  | -2312  |
| MW      | 0.16      | 0.07  | -2265  | 0.16            | 0.07  | 0.00  | -2258  | 0.13           | 0.07  | 0.16  | -2308  | 0.16            | 0.07  | 0.00  | -2258  | 0.16           | 0.07  | 0.00  | -2259  |
| RA      | 0.17      | 0.09  | -1850  | 0.16            | 0.08  | 0.06  | -1852  | 0.10           | 0.09  | 0.25  | -1958  | 0.16            | 0.09  | 0.10  | -1847  | 0.16           | 0.08  | 0.06  | -1855  |
| SMP     | 0.12      | 0.10  | -1778  | 0.10            | 0.08  | 0.08  | -1802  | 0.05           | 0.10  | 0.17  | -1915  | 0.09            | 0.09  | 0.13  | -1812  | 0.10           | 0.08  | 0.09  | -1807  |
| LZ      | 0.15      | 0.07  | -2237  | 0.15            | 0.07  | 0.05  | -2237  | 0.10           | 0.07  | 0.20  | -2362  | 0.15            | 0.07  | 0.02  | -2230  | 0.15           | 0.07  | 0.05  | -2240  |
| DS      | 0.18      | 0.11  | -1655  | 0.18            | 0.10  | 0.04  | -1649  | 0.15           | 0.11  | 0.16  | -1663  | 0.18            | 0.10  | 0.09  | -1649  | 0.18           | 0.10  | 0.04  | -1650  |
| BG      | 0.17      | 0.08  | -2094  | 0.16            | 0.08  | 0.04  | -2089  | 0.11           | 0.08  | 0.24  | -2206  | 0.17            | 0.08  | 0.00  | -2087  | 0.16           | 0.08  | 0.04  | -2092  |
| Total   |           |       | -16803 |                 |       |       | -16783 |                |       |       | -17344 |                 |       |       | -16776 |                |       |       | -16800 |

875  
876 **Supplementary Table 2.** Fit parameters for the five models in the timing task. All values are unitless.

| Subject | Identity context |      |                     |       |       |            |        | No additional SMN prediction |      |                     | Remapped context |      |                     |       |       |            |        |
|---------|------------------|------|---------------------|-------|-------|------------|--------|------------------------------|------|---------------------|------------------|------|---------------------|-------|-------|------------|--------|
|         | RMSE             | BIAS | $\sqrt{\text{VAR}}$ | $w_m$ | $w_p$ | $\sigma_p$ | offset | RMSE                         | BIAS | $\sqrt{\text{VAR}}$ | RMSE             | BIAS | $\sqrt{\text{VAR}}$ | $w_m$ | $w_p$ | $\sigma_p$ | offset |
| EG      | 0.94             | 0.13 | 0.93                | 0.00  | 0.07  | 0.00       | 0.17   | 1.38                         | 0.15 | 1.38                | 1.60             | 0.52 | 1.51                | 0.06  | 0.06  | 0.66       | -0.24  |
| IG      | 1.77             | 0.51 | 1.69                | 0.08  | 0.06  | 1.30       | 1.15   | 2.13                         | 0.77 | 1.99                | 2.63             | 1.23 | 2.32                | 0.12  | 0.11  | 0.00       | -0.44  |
| JK      | 1.38             | 0.35 | 1.33                | 0.06  | 0.06  | 0.89       | 0.90   | 1.77                         | 0.52 | 1.69                | 1.84             | 0.86 | 1.62                | 0.09  | 0.01  | 1.28       | -0.29  |
| RC      | 1.28             | 0.24 | 1.25                | 0.04  | 0.06  | 0.90       | 0.69   | 1.58                         | 0.35 | 1.54                | 1.79             | 0.83 | 1.58                | 0.08  | 0.07  | 0.00       | -0.27  |
| DS      | 1.43             | 0.49 | 1.35                | 0.07  | 0.06  | 0.91       | 0.56   | 1.88                         | 0.72 | 1.73                | 2.34             | 0.76 | 2.21                | 0.08  | 0.10  | 0.56       | -0.33  |
| SMP     | 1.75             | 0.57 | 1.65                | 0.07  | 0.01  | 1.55       | 0.59   | 1.97                         | 0.75 | 1.82                | 2.33             | 0.99 | 2.11                | 0.09  | 0.00  | 1.85       | -0.22  |
| TT      | 0.62             | 0.07 | 0.62                | 0.00  | 0.05  | 0.17       | -0.10  | 0.92                         | 0.10 | 0.91                | 1.62             | 0.31 | 1.59                | 0.03  | 0.08  | 0.00       | -0.22  |

877

878

**Supplementary Table 3.** Subject performance and observer model parameters for the length task in the identity and remapped contexts,

879

along with performance predicted for the remapped context under the prediction of no additional SMN. All values are expressed in degrees

880

visual angle, except for  $w_m$  and  $w_p$ , which are unitless.

881

882

| Subject | Equal-SMN |       |            |       | Early-Inference |       |            |       |       | Late-Inference |       |            |       |       | Late-Ignore-SMN |       |            |       |       | Observer-Actor |       |            |       |       |
|---------|-----------|-------|------------|-------|-----------------|-------|------------|-------|-------|----------------|-------|------------|-------|-------|-----------------|-------|------------|-------|-------|----------------|-------|------------|-------|-------|
|         | $w_m$     | $w_p$ | $\sigma_p$ | BIC   | $w_m$           | $w_p$ | $\sigma_p$ | $w_t$ | BIC   | $w_m$          | $w_p$ | $\sigma_p$ | $w_t$ | BIC   | $w_m$           | $w_p$ | $\sigma_p$ | $w_t$ | BIC   | $w_m$          | $w_p$ | $\sigma_p$ | $w_t$ | BIC   |
| EG      | 0.03      | 0.07  | 0.00       | 5720  | 0.02            | 0.07  | 0.00       | 0.16  | 5905  | 0.00           | 0.07  | 0.32       | 0.06  | 5608  | 0.01            | 0.07  | 0.34       | 0.06  | 5695  | 0.02           | 0.06  | 0.39       | 0.21  | 5883  |
| IG      | 0.10      | 0.10  | 0.66       | 4988  | 0.09            | 0.10  | 0.83       | 0.15  | 5154  | 0.08           | 0.10  | 0.77       | 0.09  | 4983  | 0.09            | 0.09  | 1.00       | 0.09  | 4993  | 0.09           | 0.08  | 1.03       | 0.23  | 5152  |
| JK      | 0.07      | 0.04  | 1.08       | 6485  | 0.07            | 0.04  | 1.08       | 0.08  | 6728  | 0.06           | 0.03  | 1.15       | 0.06  | 6474  | 0.07            | 0.04  | 1.08       | 0.00  | 6492  | 0.06           | 0.02  | 1.18       | 0.17  | 6724  |
| RC      | 0.06      | 0.05  | 0.88       | 6287  | 0.06            | 0.06  | 0.85       | 0.00  | 6529  | 0.04           | 0.04  | 1.01       | 0.07  | 6253  | 0.06            | 0.05  | 0.88       | 0.00  | 6294  | 0.05           | 0.04  | 0.96       | 0.14  | 6527  |
| DS      | 0.08      | 0.10  | 0.00       | 6967  | 0.07            | 0.07  | 0.78       | 0.30  | 7199  | 0.07           | 0.10  | 0.00       | 0.03  | 6974  | 0.07            | 0.10  | 0.17       | 0.07  | 6968  | 0.06           | 0.08  | 0.73       | 0.29  | 7201  |
| SMP     | 0.09      | 0.07  | 1.33       | 4880  | 0.07            | 0.00  | 1.56       | 0.26  | 5036  | 0.07           | 0.06  | 1.37       | 0.06  | 4883  | 0.08            | 0.06  | 1.40       | 0.04  | 4887  | 0.07           | 0.00  | 1.56       | 0.28  | 5033  |
| TT      | 0.00      | 0.07  | 0.00       | 5163  | 0.02            | 0.05  | 0.00       | 0.29  | 5224  | 0.00           | 0.06  | 0.00       | 0.05  | 5077  | 0.01            | 0.05  | 0.01       | 0.07  | 5054  | 0.01           | 0.05  | 0.01       | 0.29  | 5204  |
| Total   |           |       |            | 40559 |                 |       |            |       | 41857 |                |       |            |       | 40334 |                 |       |            |       | 40466 |                |       |            |       | 41805 |

883

884

**Supplementary Table 4.** Fit parameters the for five models in the length task. All values are unitless except  $\sigma_p$ , which is in units of visual

885

degrees.
